# Supplementary material for: Transgene-free direct conversion of murine fibroblasts into functional muscle stem cells
Source: Springer Nature journal article supplement (doi:10.1038/s41536-023-00317-z), 2023-08-08
Supplement: MOESM1 [file 41536_2023_317_MOESM1_ESM.pdf]

Supplementary Figure 1

a

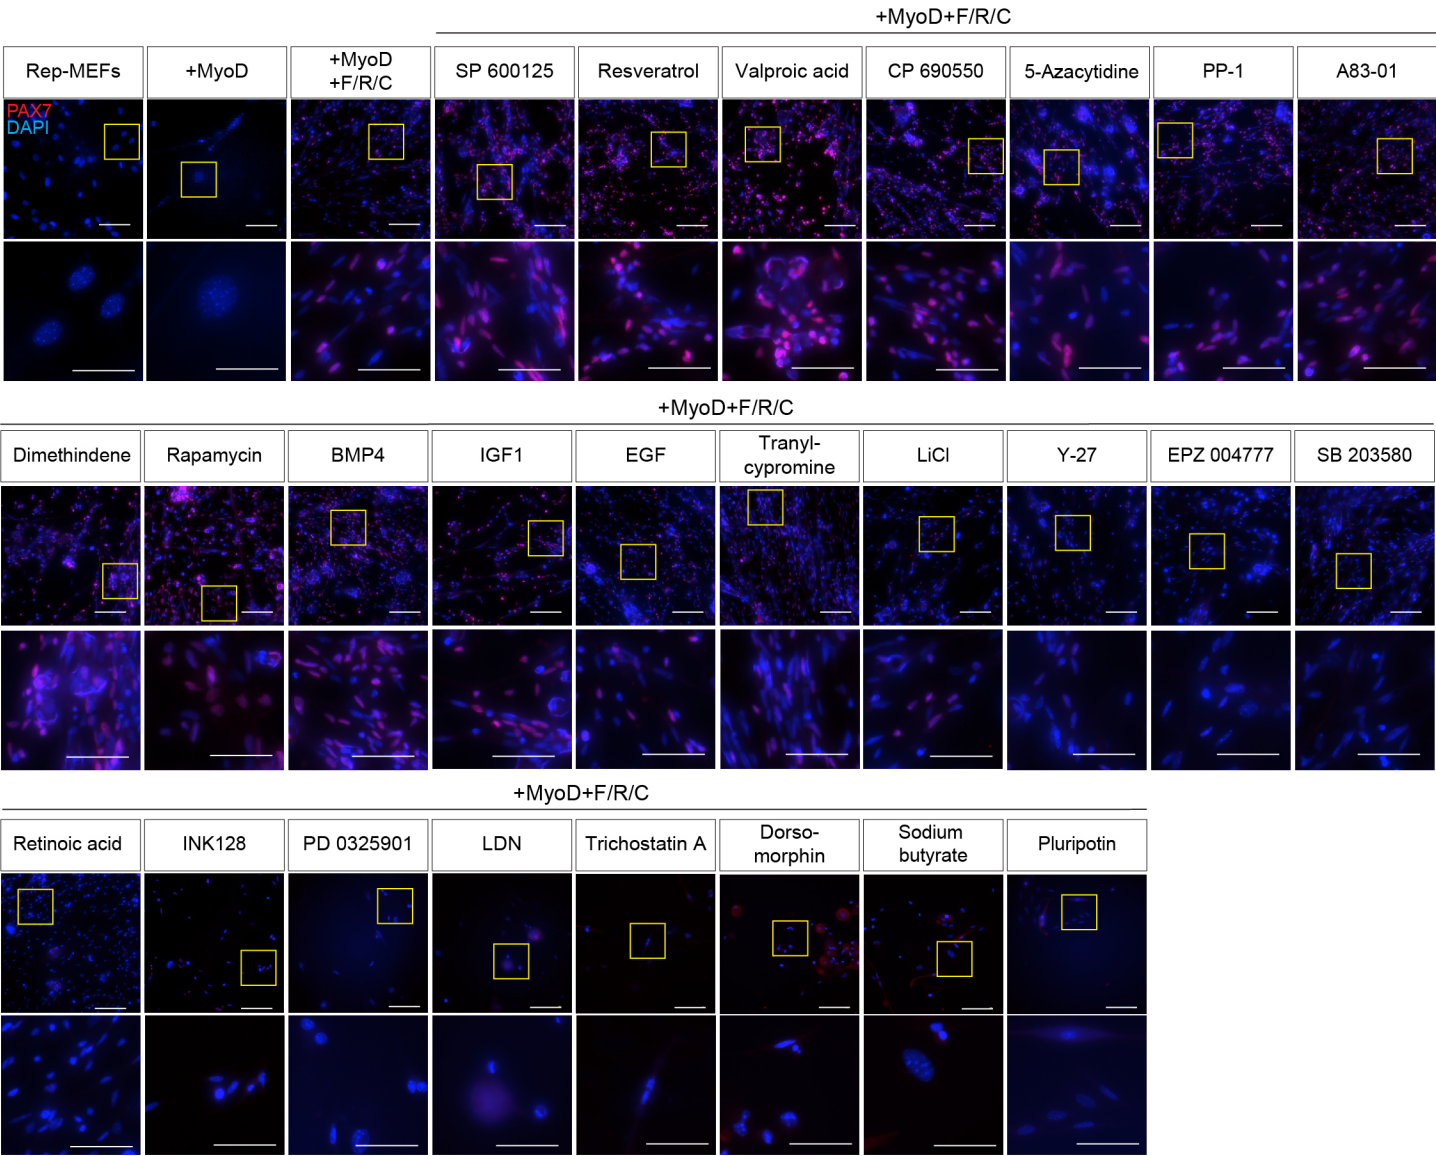

b

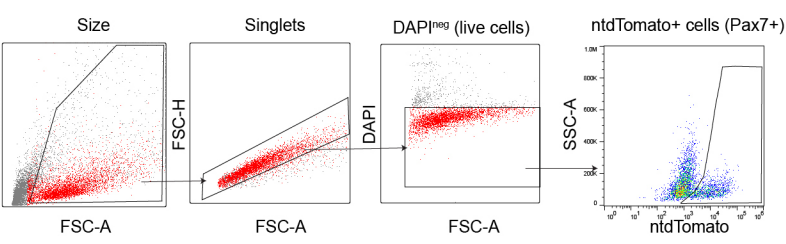

c

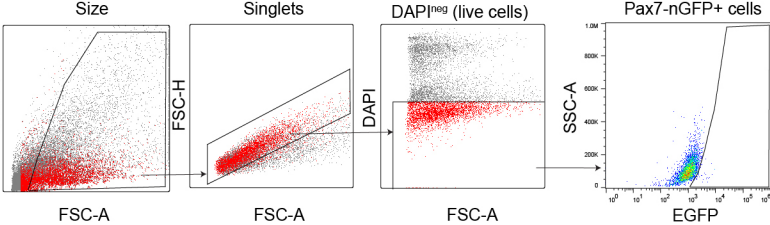

e

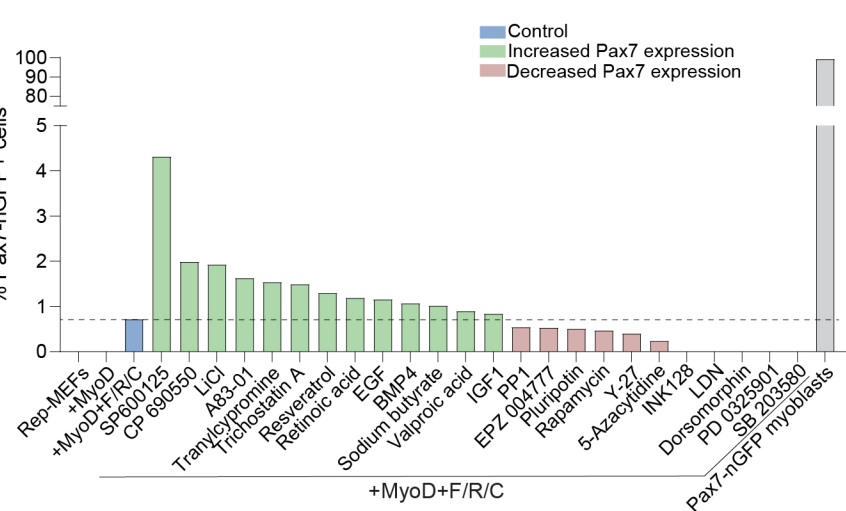

d

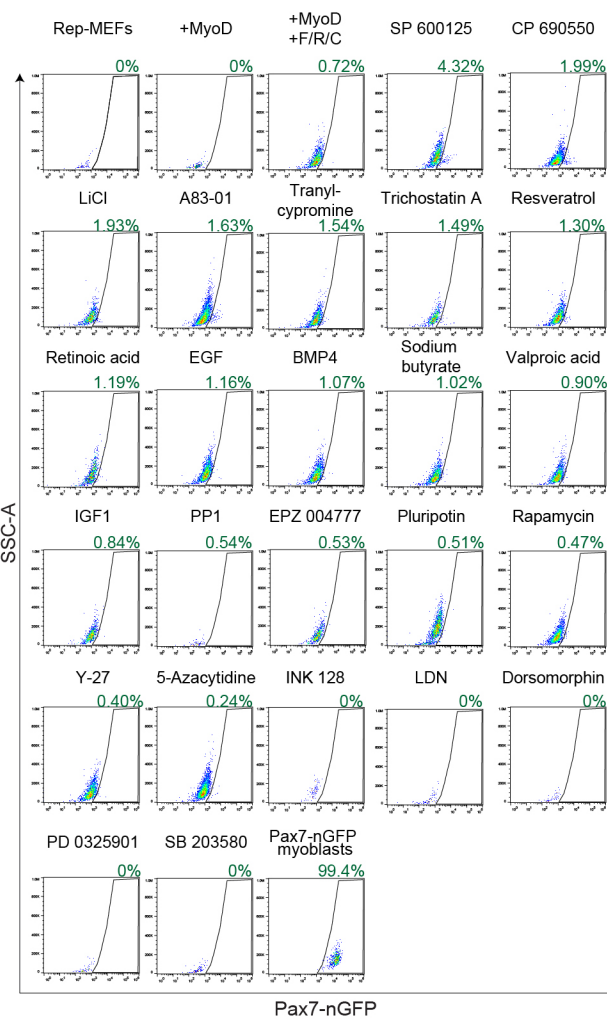

Supplementary Figure 1: Compound screen identifies small molecules that facilitate iMPC production

**(a)** Representative immunofluorescence images for PAX7 expression 14 days after initiation of reprogramming with the indicated conditions. Scale bar, 100 $\mu$ m; scale bar inlay, 50 $\mu$ m. **(b)** Representative FACS plots depicting gating strategy used in this study to detect ntdTomato<sup>+</sup> cells. **(c)** Representative FACS plots depicting gating strategy used in this study to detect Pax7-nGFP<sup>+</sup> cells. **(d)** FACS plots showing Pax7-nGFP expression in Rep-MEFs subjected to the indicated conditions for 14 days. **(e)** A graph showing quantification of (d).



## Supplementary Figure 2

**a**

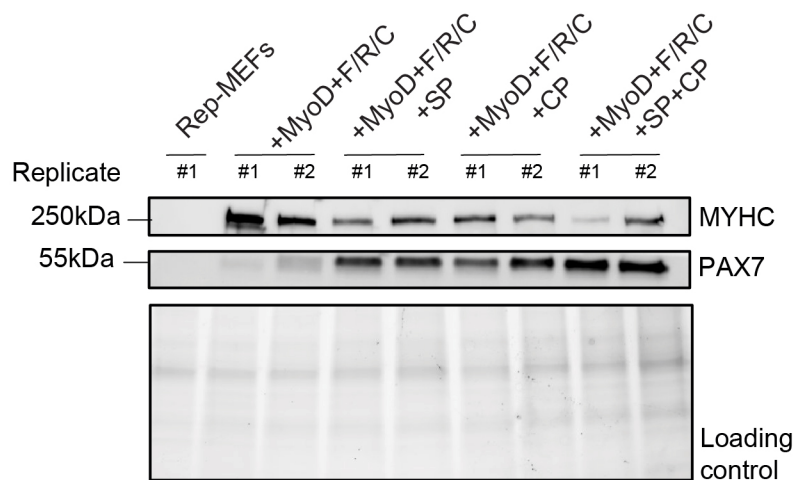

Unprocessed images

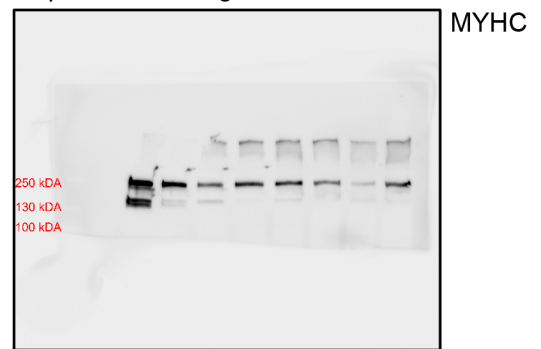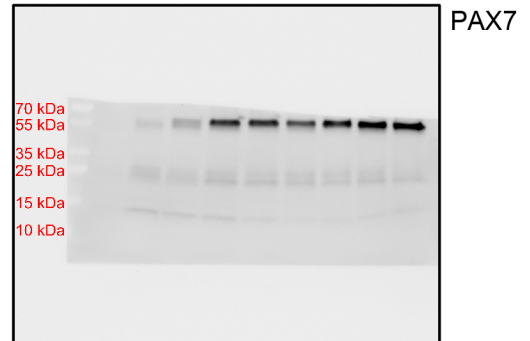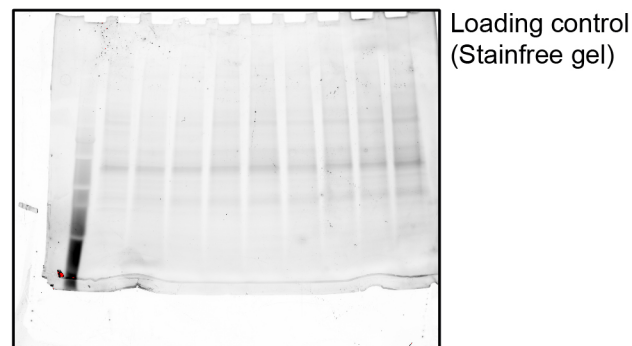

**b**

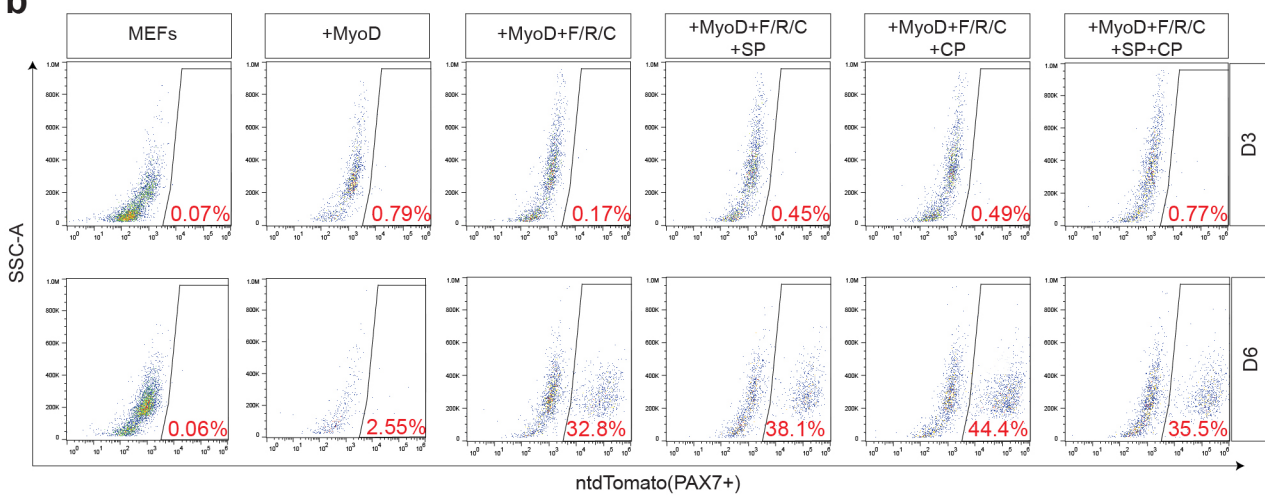

**c**

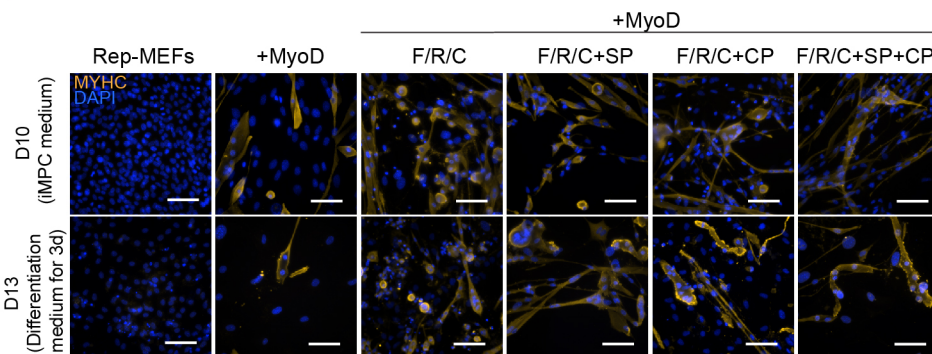

**d**

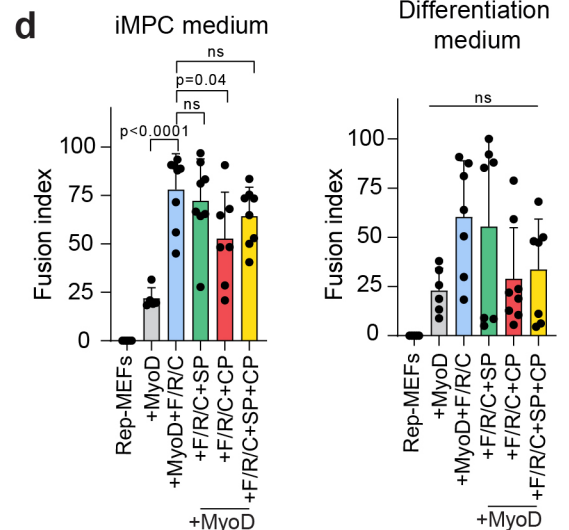

Supplementary Figure 2: Pax7 expression and fusion index analysis following SP or CP treatment

**(a)** Western blot analysis showing MYHC and PAX7 protein expression in MEFs subjected to the indicated conditions at day 10 of reprogramming. Stain-free gel is shown as protein loading control. The results for two different MEF lines are shown. Processed (left) and unprocessed (right) images are shown. **(b)** FACS-analysis of Pax7-CreERT2; R26-LSL-ntdTomato Rep-MEFs reprogrammed in the presence of the indicated conditions and days. 4-OHT was kept from day 0 of reprogramming. **(c)** Representative immunofluorescence images of Rep-MEFs at day 10 in iMPC medium or day 13 (10 days in iMPC medium, 3 days in differentiation medium) of a reprogramming course. Scale bar, 100 $\mu$ m. **(d)** Quantification of fusion index in the indicated reprogramming conditions. Per condition, 5-8 random fields of view were quantified. Data are shown as mean $\pm$ SD. Significance was determined by ordinary one-way ANOVA using Dunnett's multiple comparisons test taking MyoD+F/R/C as control condition (ns=non-significant).

**a**

Passage 1 (7 days post split)

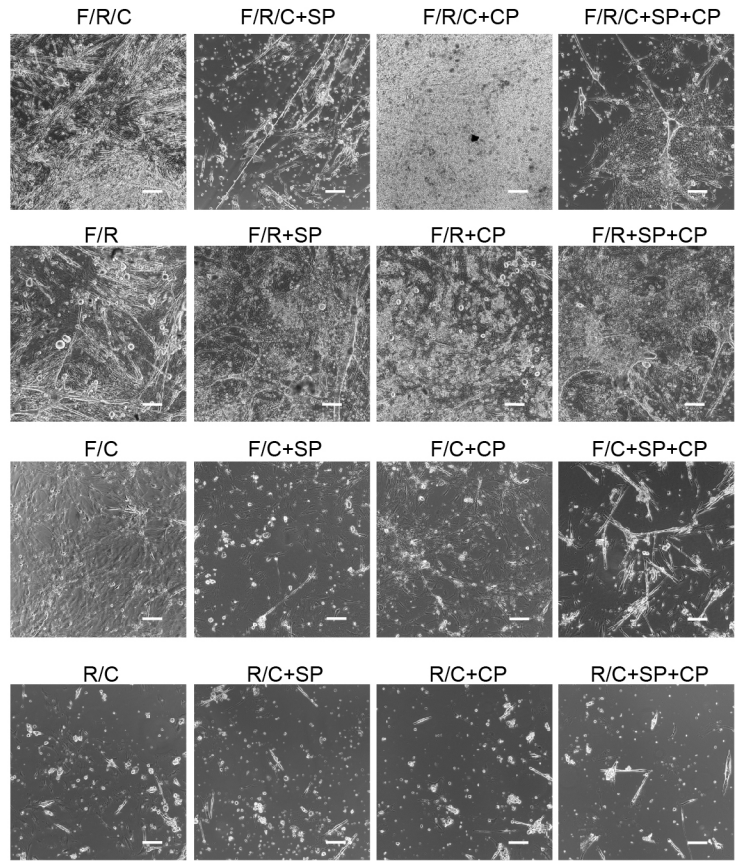

b

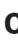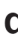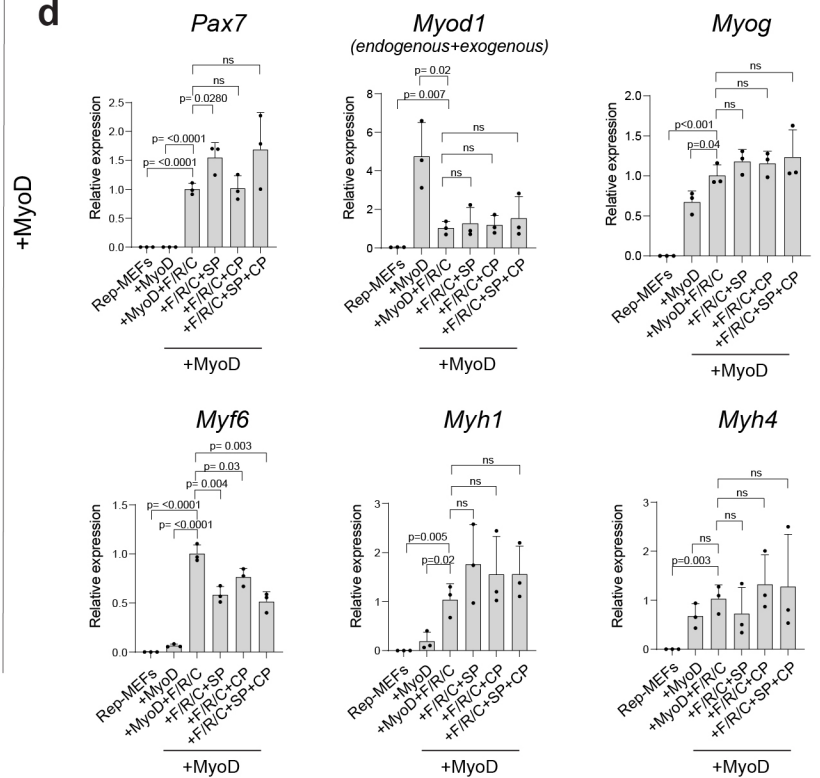



Supplementary Figure 3: Dissecting the effect of small molecule combinations on iMPC derivation

**(a)** Representative brightfield images of Rep-MEFs exposed to the indicated conditions and times at P1. Scale bar, 200 $\mu$ m. **(b)** FACS plots of *Pax7-CreERT2; R26-LSL-ntdTomato* Rep-MEF #5 showing percentages of PAX7<sup>+</sup>/ntdTomato<sup>+</sup> cells at day 10 of reprogramming using the indicated conditions. Cells were labeled with 4-OHT one day prior to analysis. **(c)** FACS-quantification of *Pax7-CreERT2; R26-LSL-ntdTomato* Rep-MEFs on day 10 of reprogramming using the indicated conditions. Cells were labeled with 4-OHT one day prior to analysis. Data are shown as mean $\pm$ SD. N=3, each dot represents a different cell line. Significance was determined by two-tailed unpaired t-tests. **(d)** RT-qPCR analysis of *Pax7-CreERT2; R26-LSL-ntdTomato* Rep-MEFs #4-6 subjected to the indicated conditions at day 10 of reprogramming. Expression is shown relative to the “+MyoD+F/R/C” condition. Data are shown as mean $\pm$ SD. N=3, each dot represents a different cell line. Significance is determined by two-tailed unpaired t-tests.

**a**

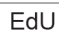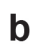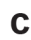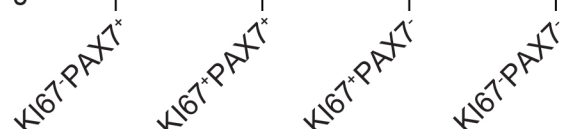

**d**

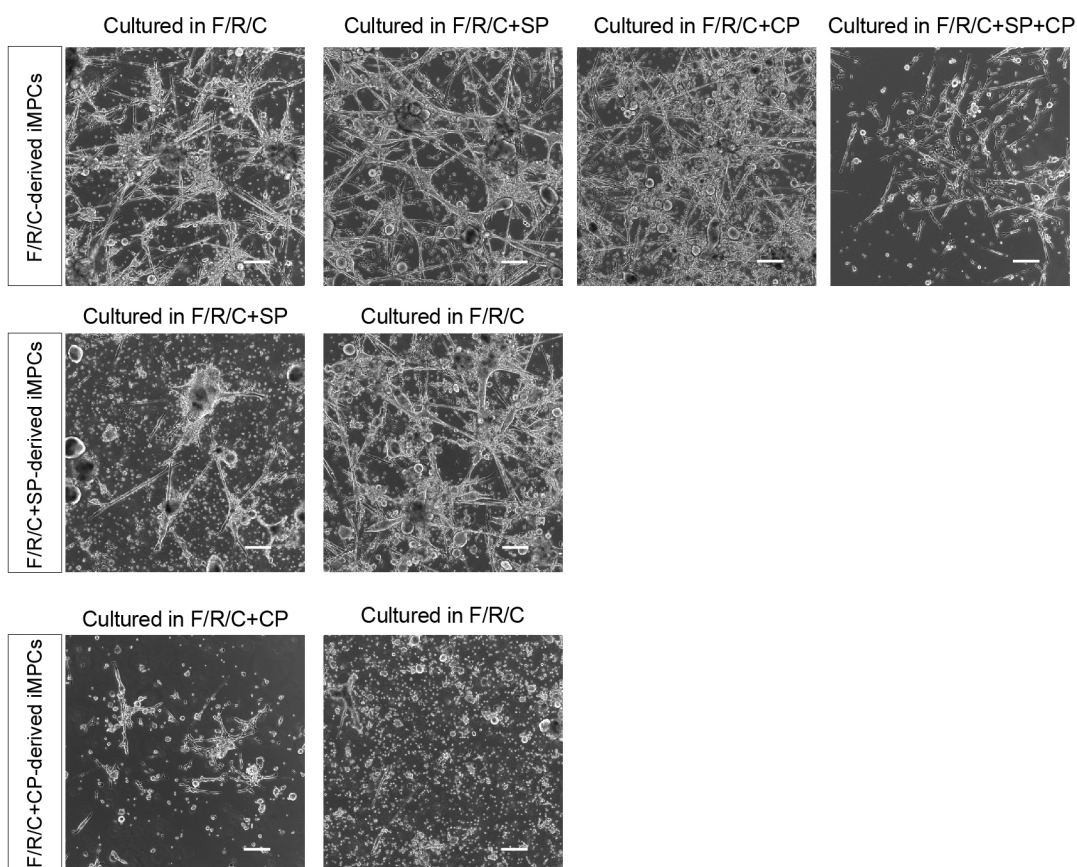

Supplementary Figure 4: Proliferation and growth analysis of iMPCs following compound treatment

**(a)** FACS plots showing percentages of EdU<sup>+</sup> cells on day 10 of reprogramming of a Rep-MEF clone using the indicated conditions. **(b)** Immunofluorescence images for the indicated conditions in iMPCs at day 10 of reprogramming. Scale bar, 100µm. **(c)** Quantification of (b). Data are shown as mean±SD. N=4, each dot represents a random field of view. Significance was determined by ordinary two-way ANOVA using Tukey's multiple comparisons test. \*p<0.05, \*\*p<0.01, \*\*\*p<0.001, \*\*\*\*p<0.0001, ns=non-significant. **(d)** Brightfield images of passage 5 iMPCs reprogrammed using the indicated conditions, and maintained for 17 days under the original or an alternative culture condition. Scale bar, 200µm.



# Supplementary Figure 5

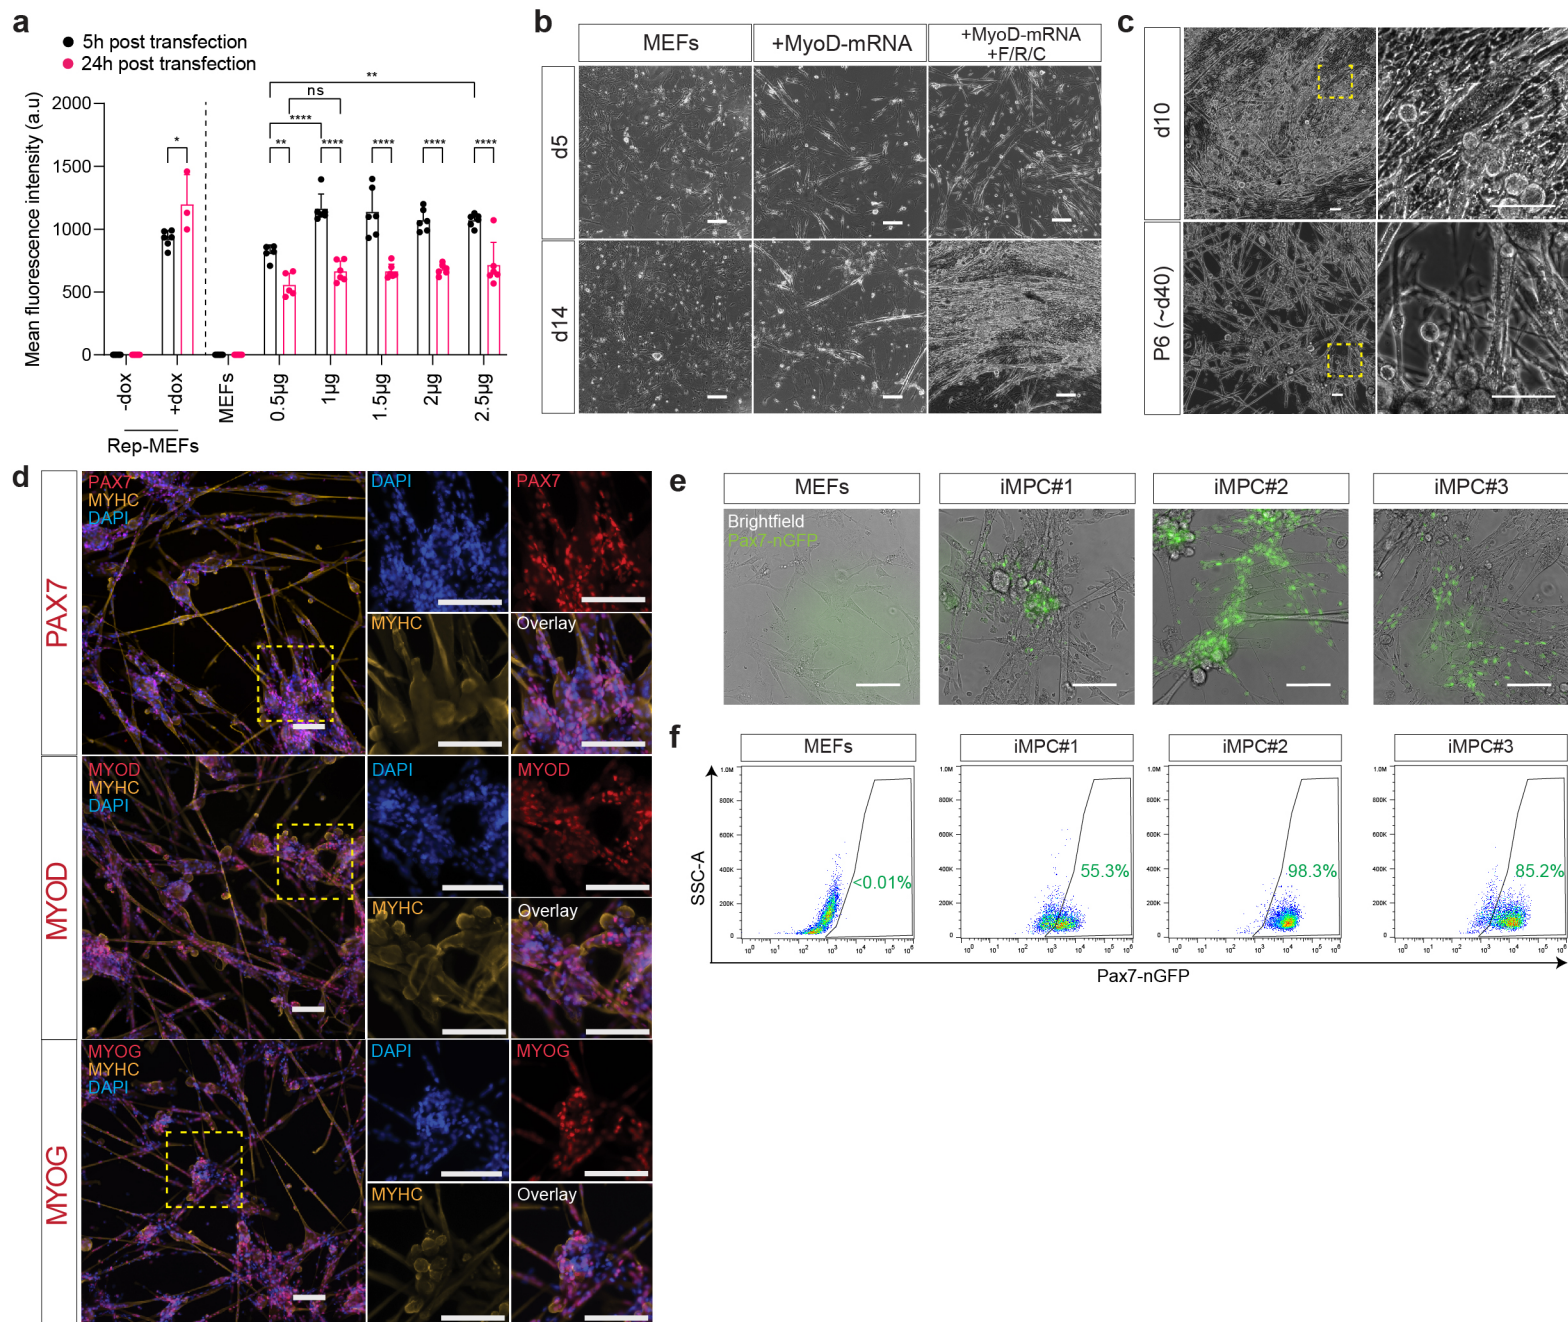

### Supplementary Figure 5: Molecular analysis of transgene-free iMPCs

**(a)** Quantification of mean fluorescence intensity of immunofluorescence images of MyoD-mRNA overexpression. Each data point represents the mean fluorescence intensity of all MYOD<sup>+</sup> cells per image. Data are shown as mean $\pm$ SD. N=3, each dot represents a different cell line. Either 1 or 2 random fields of view were quantified for each cell line. Significance is determined by a mixed-effects analysis using Tukey's multiple comparison's test with a single pooled variance, ns=non-significant; \*p<0.05, \*\*p<0.01, \*\*\*p<0.001, \*\*\*\*p<0.0001. **(b)** Representative brightfield images of MEFs subjected to the indicated conditions and days. Scale bar, 200 $\mu$ m. **(c)** Brightfield images depicting an emerging transgene-free iMPC clone at day 10 and a stable clone at passage 6. Scale bars, 100 $\mu$ m. **(d)** Representative immunofluorescence images for the indicated markers in a stable transgene-free iMPC clone at passage 5. Scale bars, 100 $\mu$ m. **(e)** Microscopy images showing Pax7-nGFP<sup>+</sup> iMPCs between P4-7. Scale bar, 100 $\mu$ m. **(f)** FACS plot analysis of Pax7-nGFP<sup>+</sup> transgene-free iMPC clones at P2-3.

## Supplementary Figure C

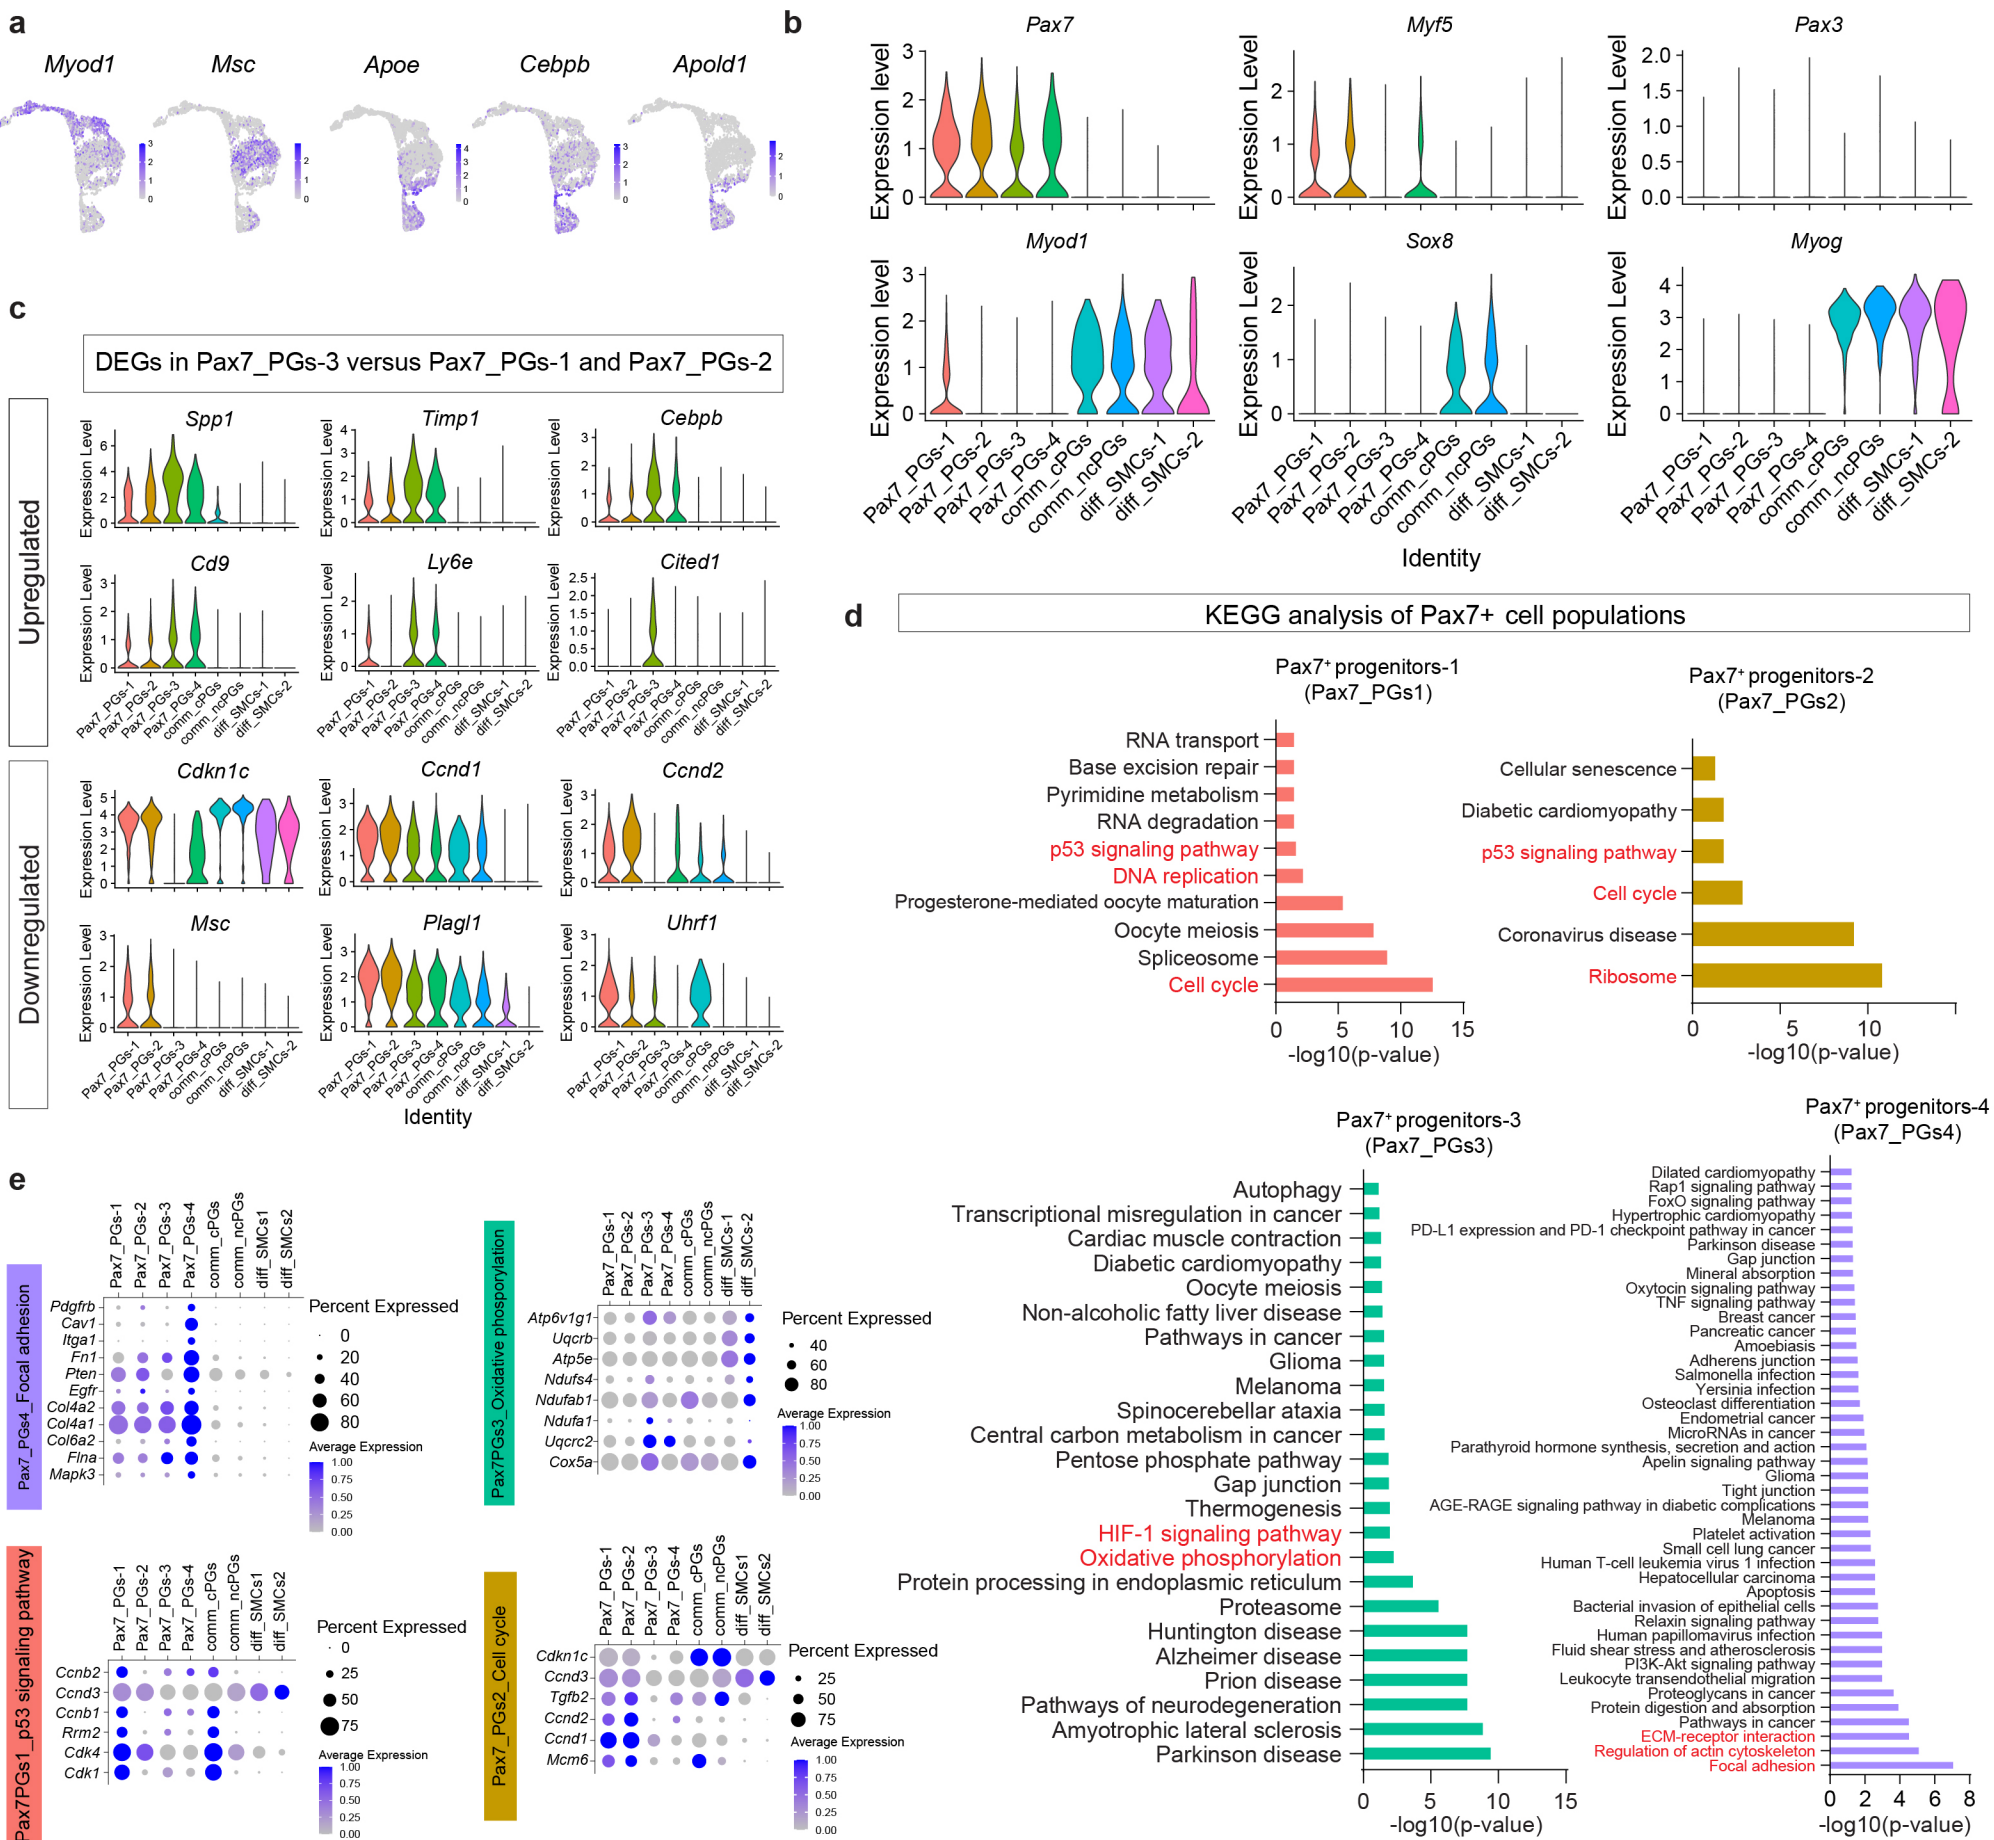



Supplementary Figure 6: scRNA-seq analysis of a transgene-free F/R/C-derived iMPC clone

**(a)** UMAP projection showing the expression level of selected genes across all cells via a color gradient. **(b)** Violin plots based on scRNA-seq data showing the expression level of key myogenic genes. **(c)** Violin plots based on scRNA-seq data showing the expression level of selected genes that are upregulated (top) and downregulated (bottom) in Pax7\_PGs-3 compared to other Pax7<sup>+</sup> progenitor cell populations. This analysis corresponds to the UMAP shown in Figure 2G. **(d)** A KEGG pathway enrichment analysis based on the marker genes of all the four Pax7<sup>+</sup> progenitor cell populations (Pax7\_PGs 1-4). Only significant pathways are shown with an FDR < 0.05. Pathways of interest are highlighted in red. **(e)** Dot plots demonstrating the expression level of selected genes that are associated with the indicated KEGG pathways for each respective cluster as shown in (d).



# Supplementary Figure 7

**a**

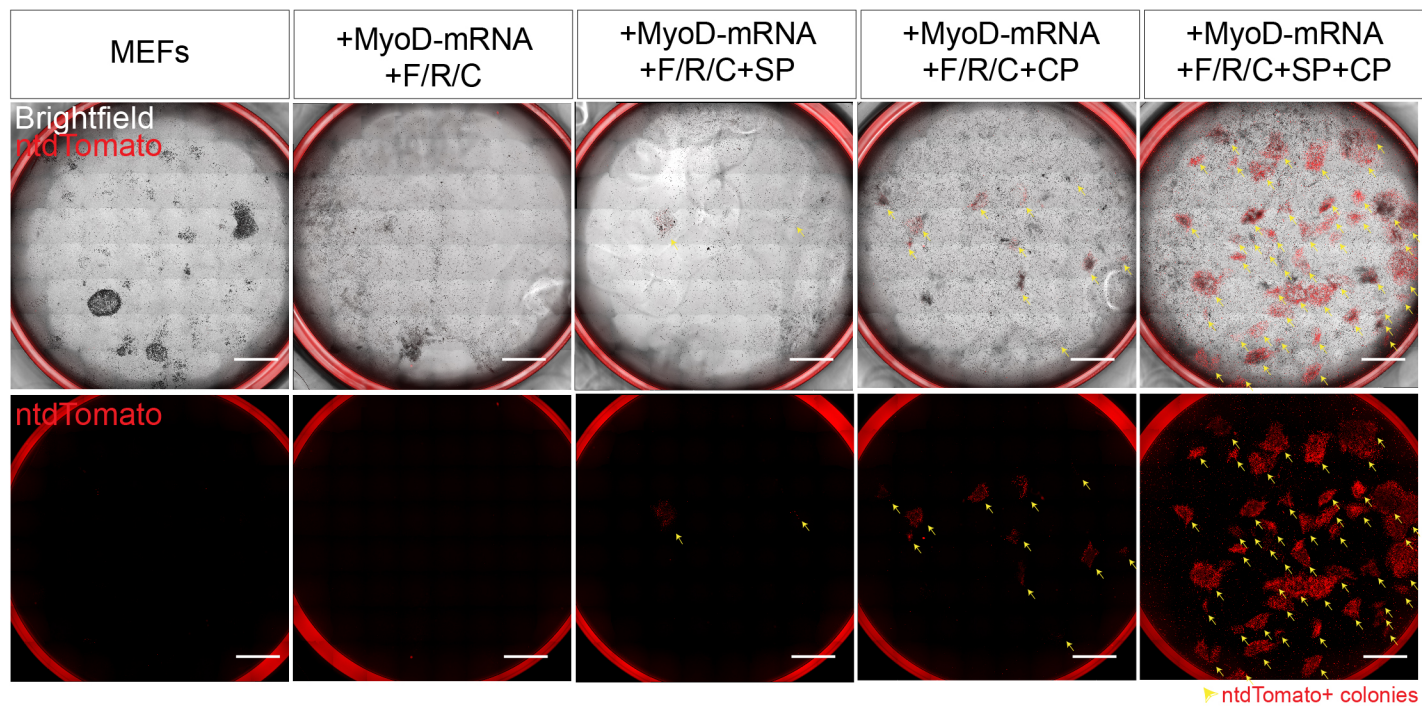

**b**

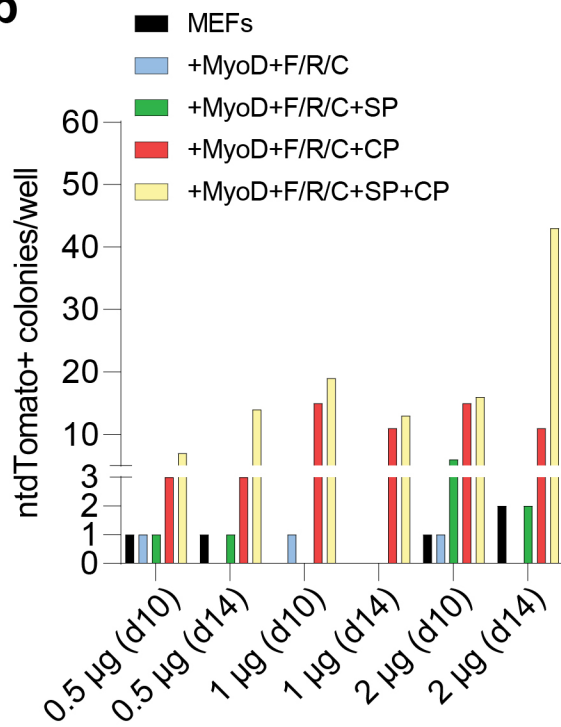

**c**

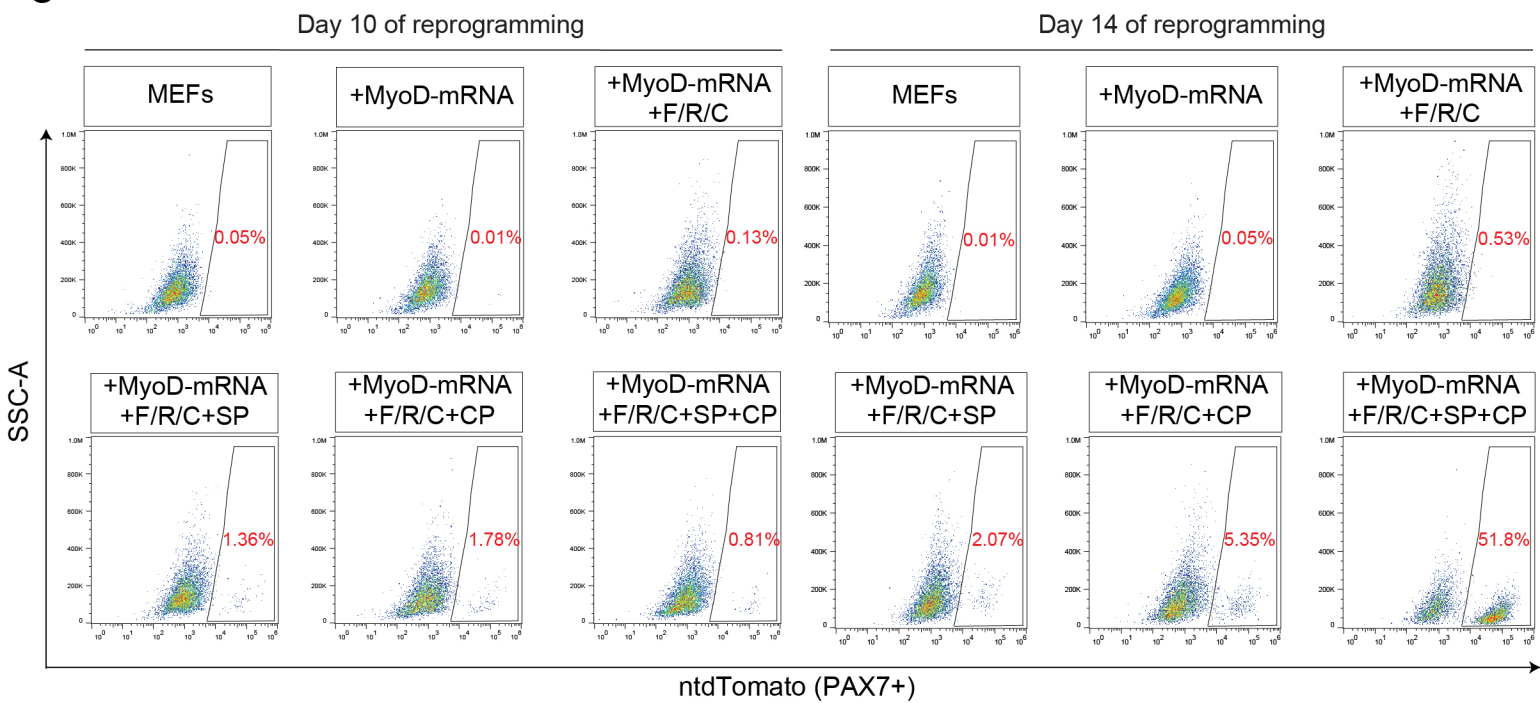

**d**

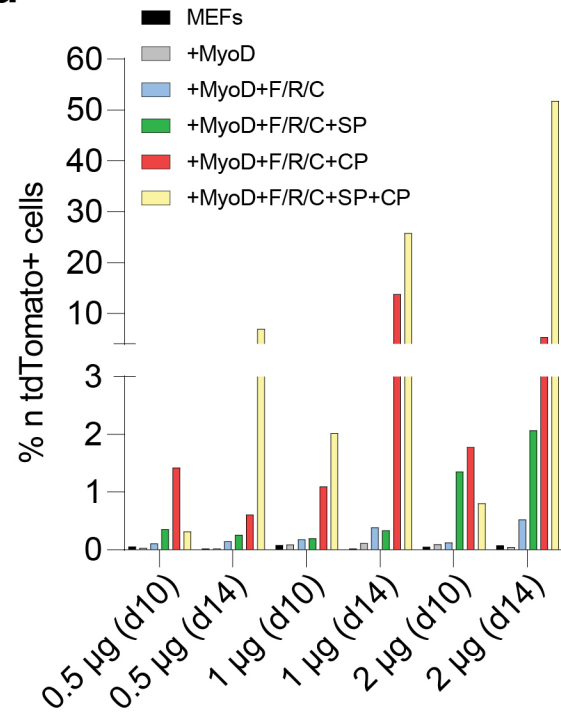

**e**

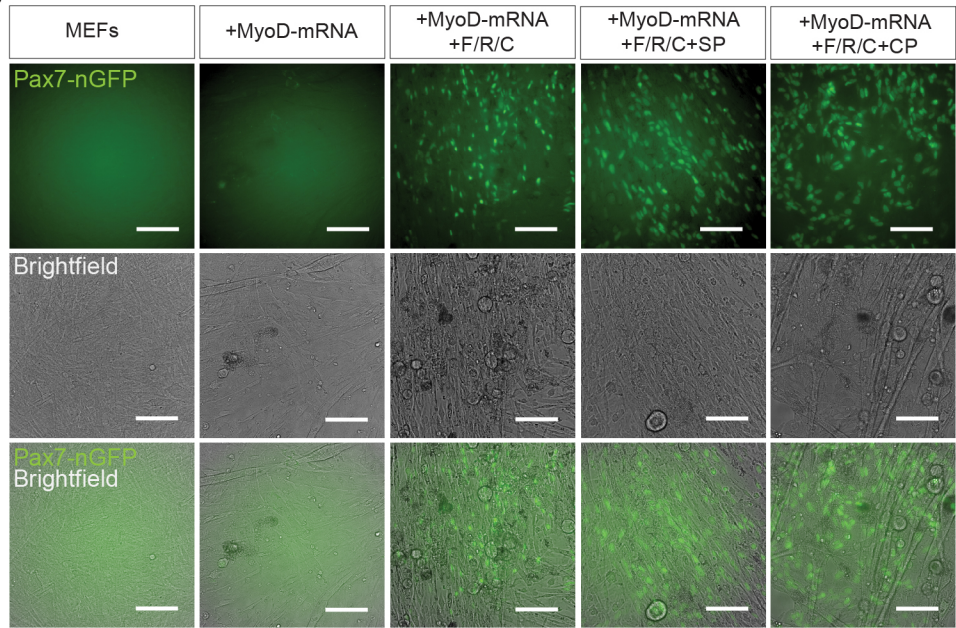

**g**

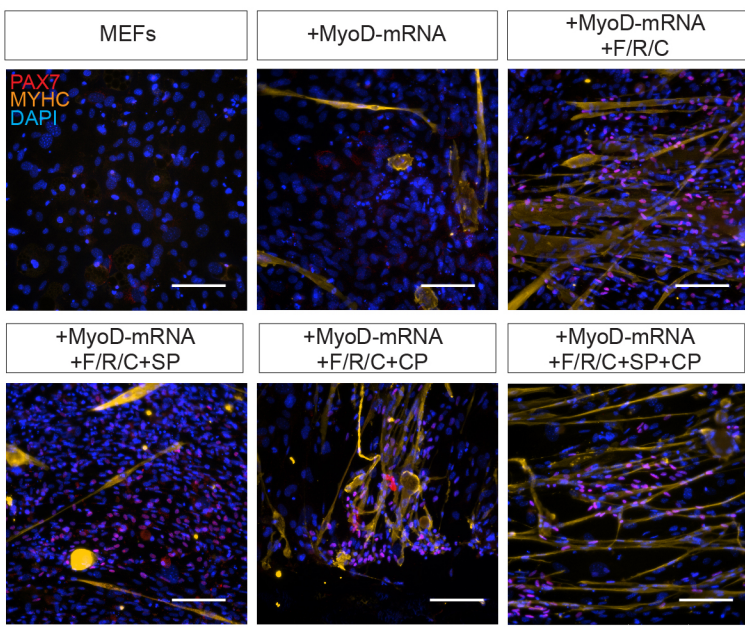

**h**

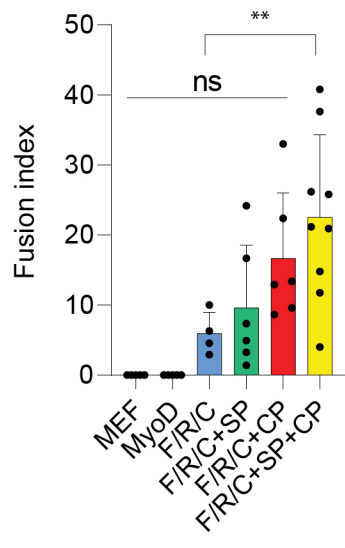

**f**

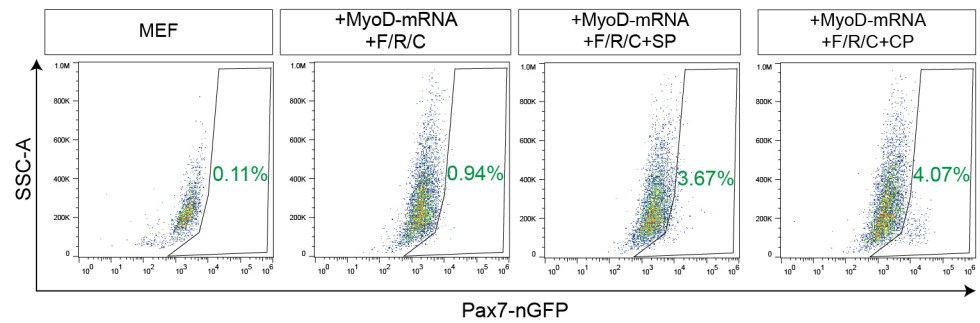

**i**

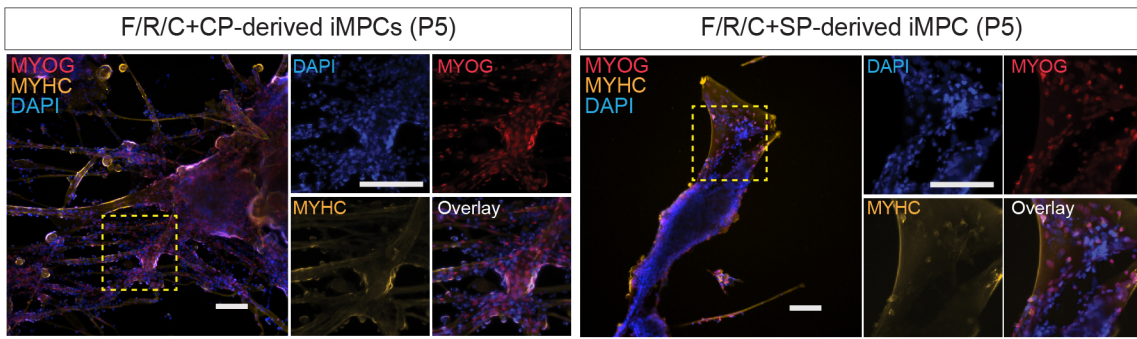



Supplementary Figure 7: Treatment with SP or CP enhance derivation of transgene-free iMPCs

**(a)** Representative whole-well brightfield and fluorescence images depicting emerging PAX7<sup>+</sup> colonies 14 days after the start of reprogramming of *Pax7-CreERT2*; *R26-LSL-ntdTomato* MEFs. Refractory MEFs that do not reprogram using conventional conditions were used in this experiment. Cells were transfected with 2μg MyoD-mRNA during the first 4 days. Emerging iMPC colonies are highlighted with yellow arrowheads. Scale bar, 5mm. **(b)** A graph showing colony quantification during optimization experiment that explored reprogramming with various amounts of MyoD-mRNA in *Pax7-CreERT2*; *R26-LSL-ntdTomato* MEFs subjected to the indicated conditions and times. N=1 cell line. **(c)** FACS-analysis of *Pax7-Cre-ERT2*; *R26-LSL-ntdTomato* MEFs subjected to the indicated conditions and times. Shown is an experiment employing transfection of 2μg MyoD-mRNA during the first 4 days. **(d)** A graph showing the percentage of PAX7<sup>+</sup>/ntdTomato<sup>+</sup> cells in an experiment that explored reprogramming with various amounts of MyoD-mRNA in *Pax7-Cre-ERT2*; *R26-LSL-ntdTomato* MEFs subjected to the indicated conditions and times. N=1 cell line. **(e)** Representative brightfield and GFP images of *Pax7-nGFP* MEFs subjected to the indicated reprogramming conditions at day 10 of reprogramming. Scale bar, 100μm. **(f)** FACS plots of *Pax7-nGFP* MEFs subjected to the indicated conditions and analyzed at day 10. **(g)** Representative immunofluorescence images of MEFs exposed to the indicated conditions at day 10 of reprogramming. Scale bar, 100μm. **(h)** Quantification of fusion index during MEF reprogramming via the indicated conditions. Data are shown as mean±SD. N=4-9, each dot represents a random field of view. Significance was determined by an ordinary one-way ANOVA using Dunnett's multiple comparisons test with a single pooled variance taking "MyoD+F/R/C" as control condition, \*\*p<0.01, ns=non-significant. **(i)** Representative immunofluorescence images for the indicated markers in stable transgene-free iMPC clones (P5) reprogrammed and kept under either F/R/C+CP or F/R/C+SP conditions. Scale bars, 100μm.



# Supplemental Figure 8

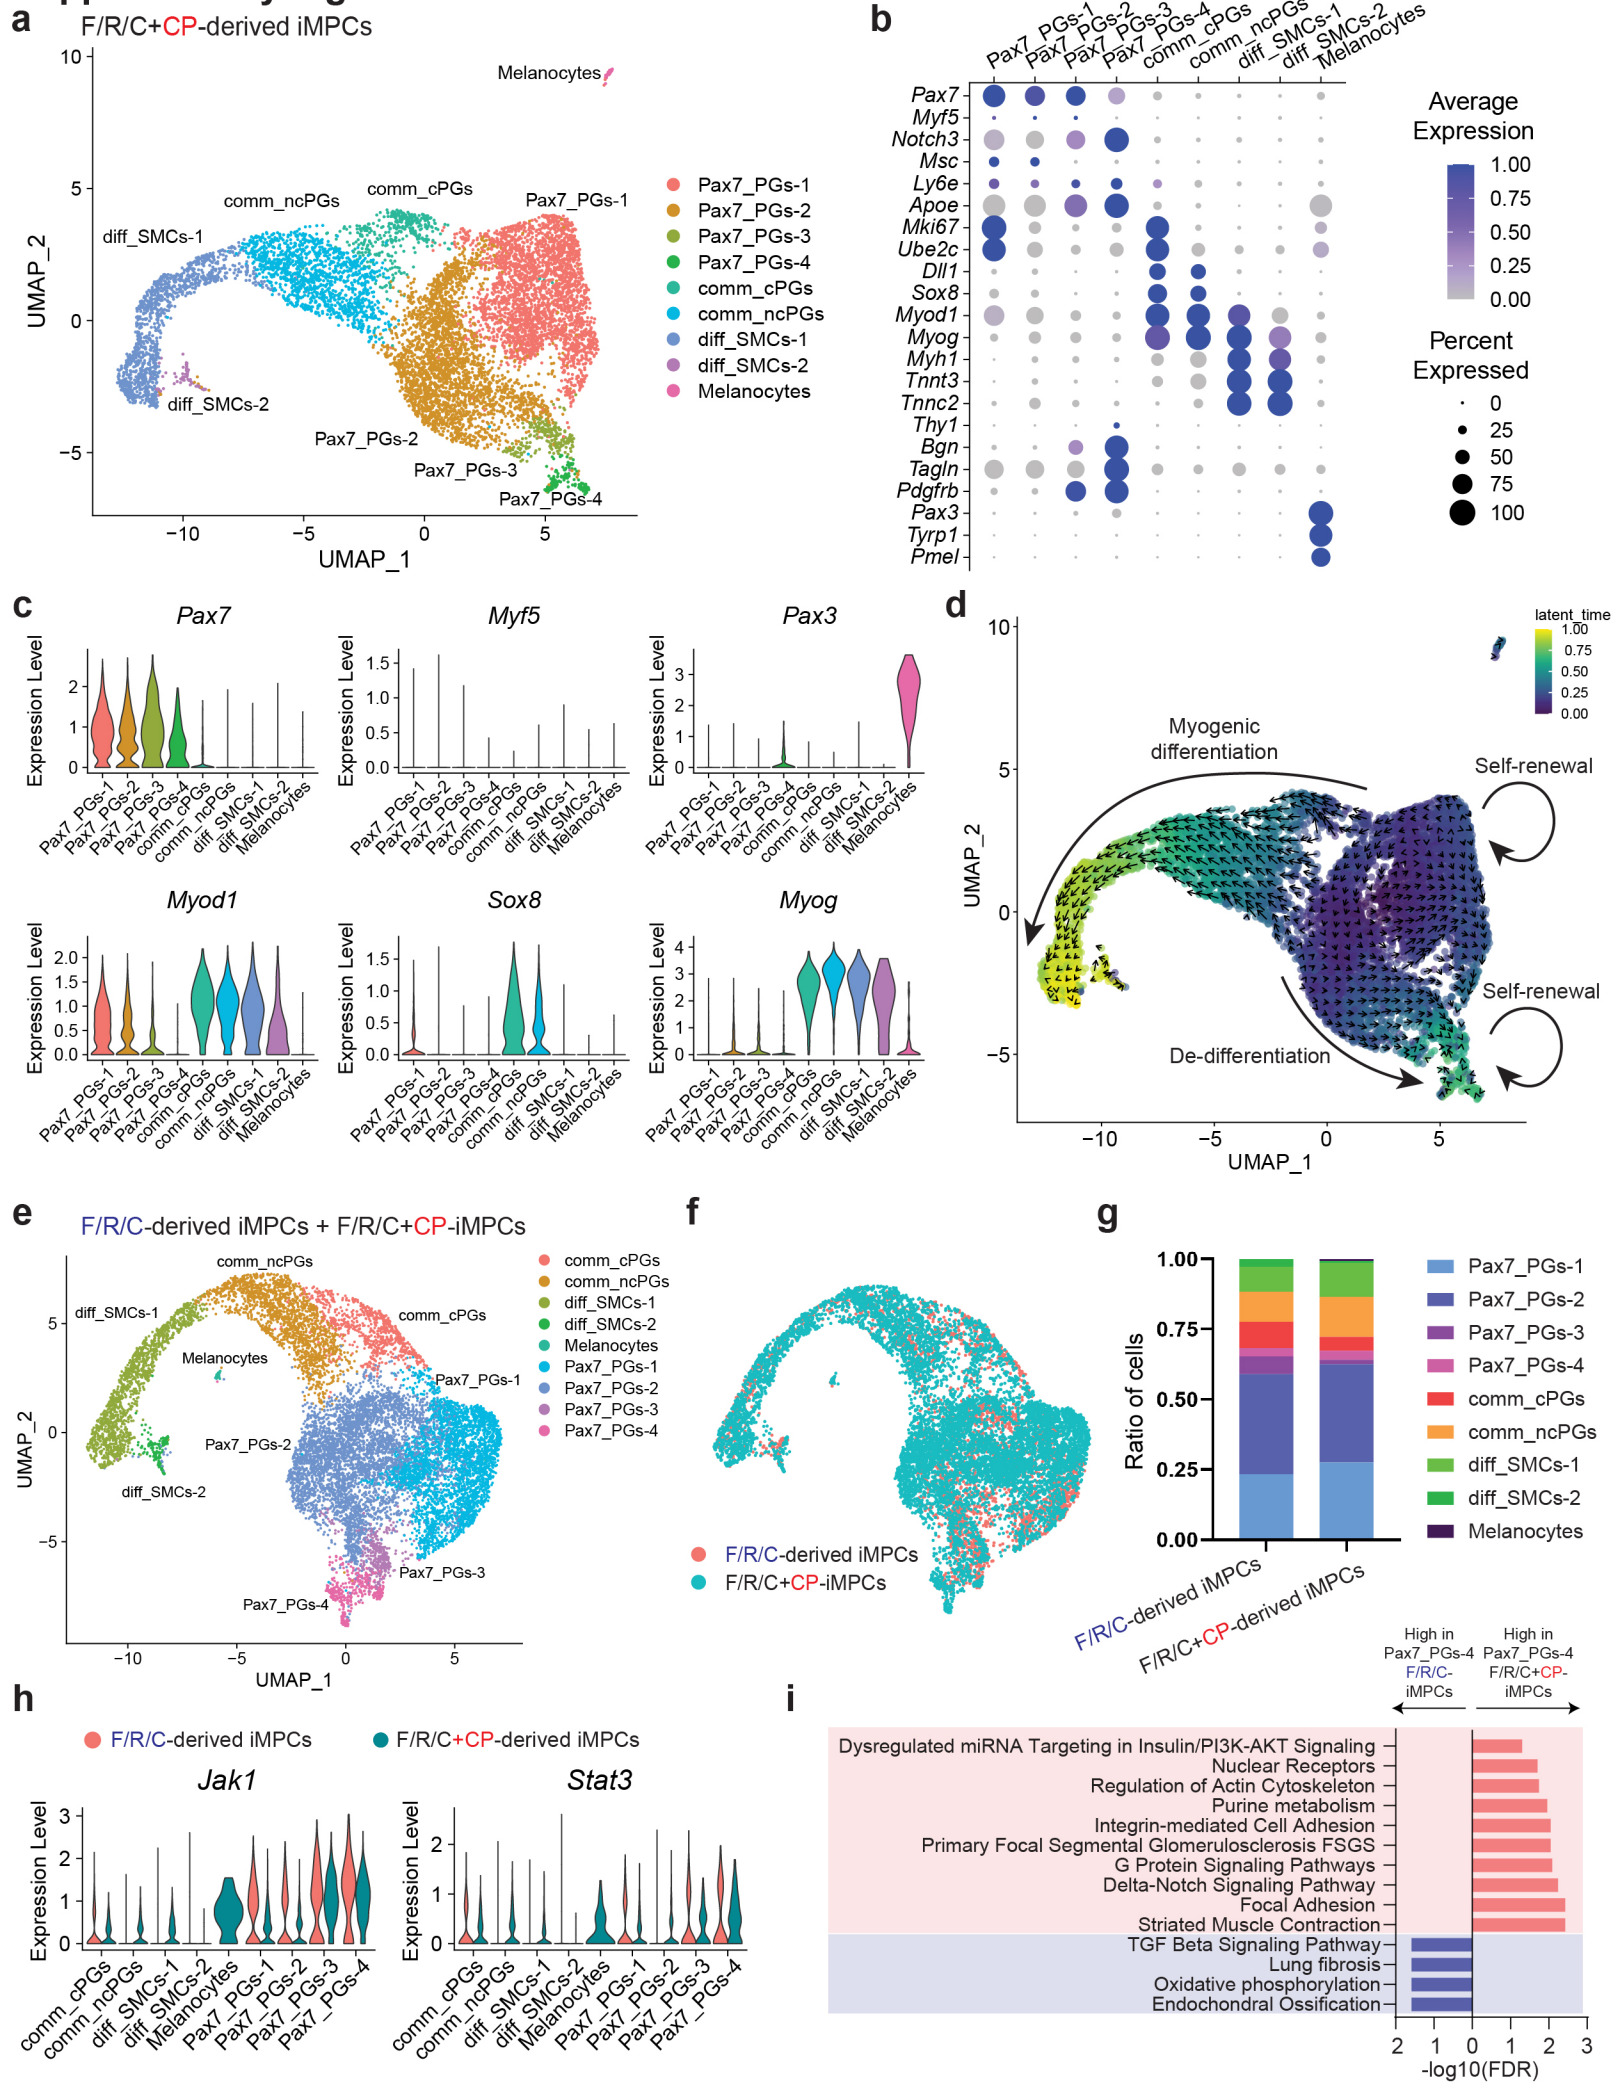

Supplementary Figure 8: scRNA-seq analysis of a stable transgene-free F/R/C+CP-derived iMPC clone

**(a)** A UMAP projection showing 8,980 cells comprising an iMPC clone at passage 5 that has been generated with MyoD-mRNA and F/R/C+CP treatment. **(b)** Dot plot indicating gene expression level of selected genes in each respective cluster. Average gene expression across all cells in each cluster is shown using a color scale. Percentage of cells expressing the indicated genes is shown as dot size. **(c)** Violin plots showing the expression level of canonical myogenic genes. Note a rare *Pax3*<sup>+</sup> cell population, most likely denoting melanocytes. **(d)** A UMAP projection of single cell trajectory as indicated by RNA velocity and colored by the latent time of the underlying cellular process. **(e)** Integrated UMAP based on scRNA-seq of +MyoD-mRNA+F/R/C and +MyoD-mRNA+F/R/C+CP-derived stable iMPC clones. **(f)** Integrated UMAPs colored by the indicated iMPC clones. **(g)** Bar plots showing cell population distribution in the indicated iMPC clones. **(h)** Violin plots showing the expression level of representative JAK-STAT pathway-related genes in the indicated samples. **(i)** Pathway enrichment analysis of the Pax7-PGs-4 cell population shown in (e) based on the Wikipathway database. Only significant pathways are shown (FDR < 0.05).

# Supplementary Figure 9

**a**

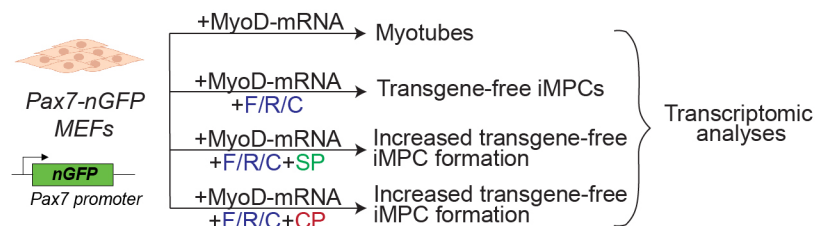

**b**

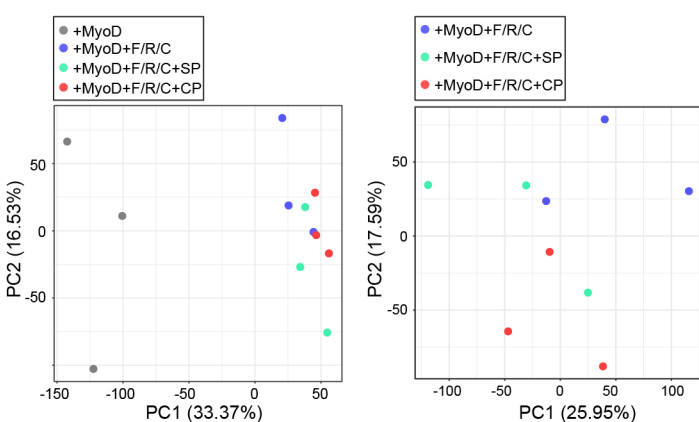

**c**

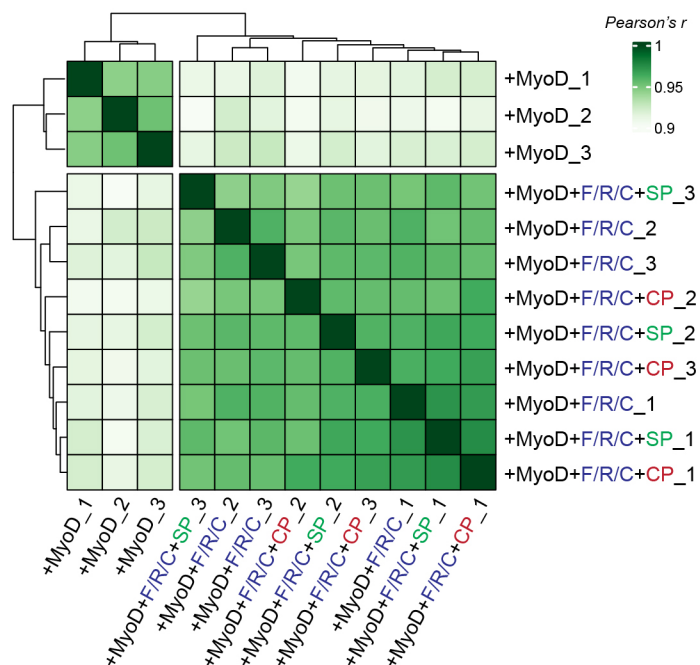

**d**

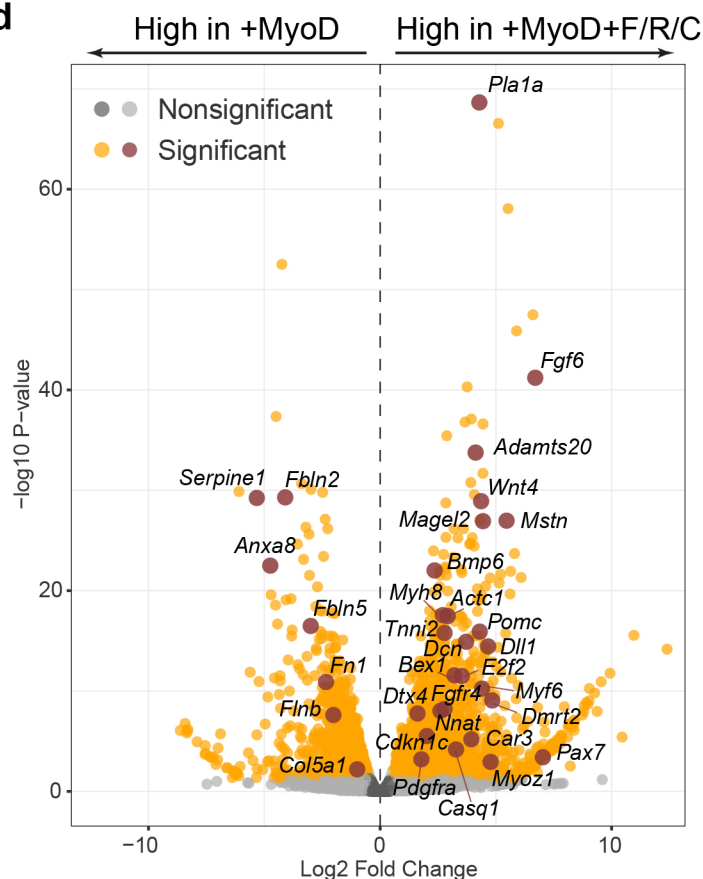

**e**

Enriched GO annotation terms (+MyoD+F/R/C vs. MyoD)

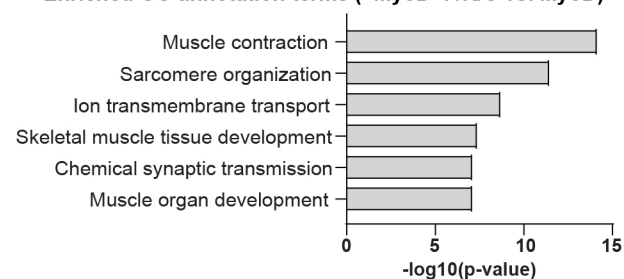

**f**

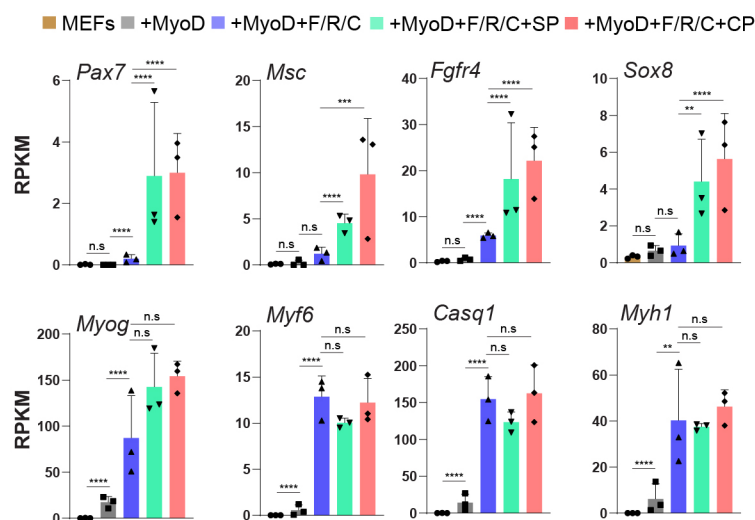

**g**

Upregulated DEGs  
( $P \leq 0.01$ , FDR  $\leq 0.05$ , Log2FC > 1, vs. +MyoD+F/R/C)

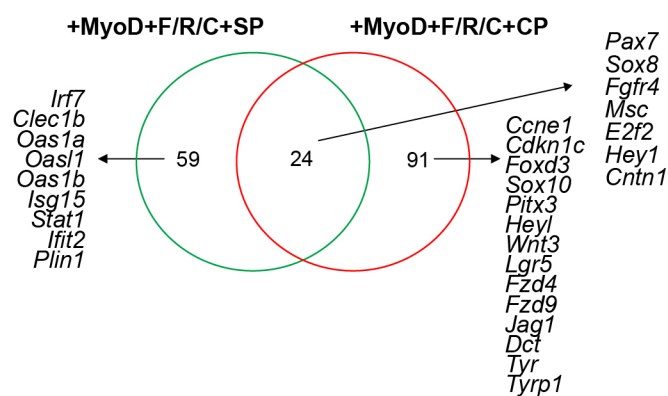

Supplementary Figure 9: Dissecting the effect of SP and CP treatment on iMPC derivation using bulk RNA-seq analysis

**(a)** A schematic depicting experimental design. **(b)** PCA based on bulk RNA-seq data of the indicated conditions at day 10 of reprogramming. PCs were determined using all genes across samples. N=3, each dot represents a different cell line. **(c)** Normalized gene counts-based correlation matrix across all the indicated replicates and conditions at day 10 of reprogramming. *Pearson's* correlation coefficient  $r$  was used as the color gradient. N=3, three different cell lines were used for this analysis. **(d)** A volcano plot based on bulk RNA-seq data showing DEGs between the indicated conditions at day 10 of reprogramming. Significant DEGs were defined using  $|\log_2FC| > 0.5$  and  $FDR < 0.05$ . **(e)** Gene ontology analysis of the indicated comparison. Only significant biological processes are shown,  $p.adjust \leq 0.01$ . **(f)** Bar graphs showing RPKM expression level of the indicated genes and reprogramming conditions at day 10 of reprogramming. The data are shown as  $mean \pm SD$ . N=3, each dot represents a different cell line. Statistical significance refers to p-value calculated between the indicated comparisons,  $**p < 0.01$ ,  $***p < 0.001$ ,  $****p < 0.0001$ , ns=non-significant. **(g)** A Venn diagram showing the overlap of upregulated genes based on RNA-seq at day 10 of reprogramming between the indicated comparisons. Only select and significantly upregulated protein-coding genes are shown. Definition of DEGs was based on  $\log_2FC > 1$ ,  $p\text{-value} \leq 0.01$  and  $FDR \leq 0.05$ .



Supplementary Figure 10

a

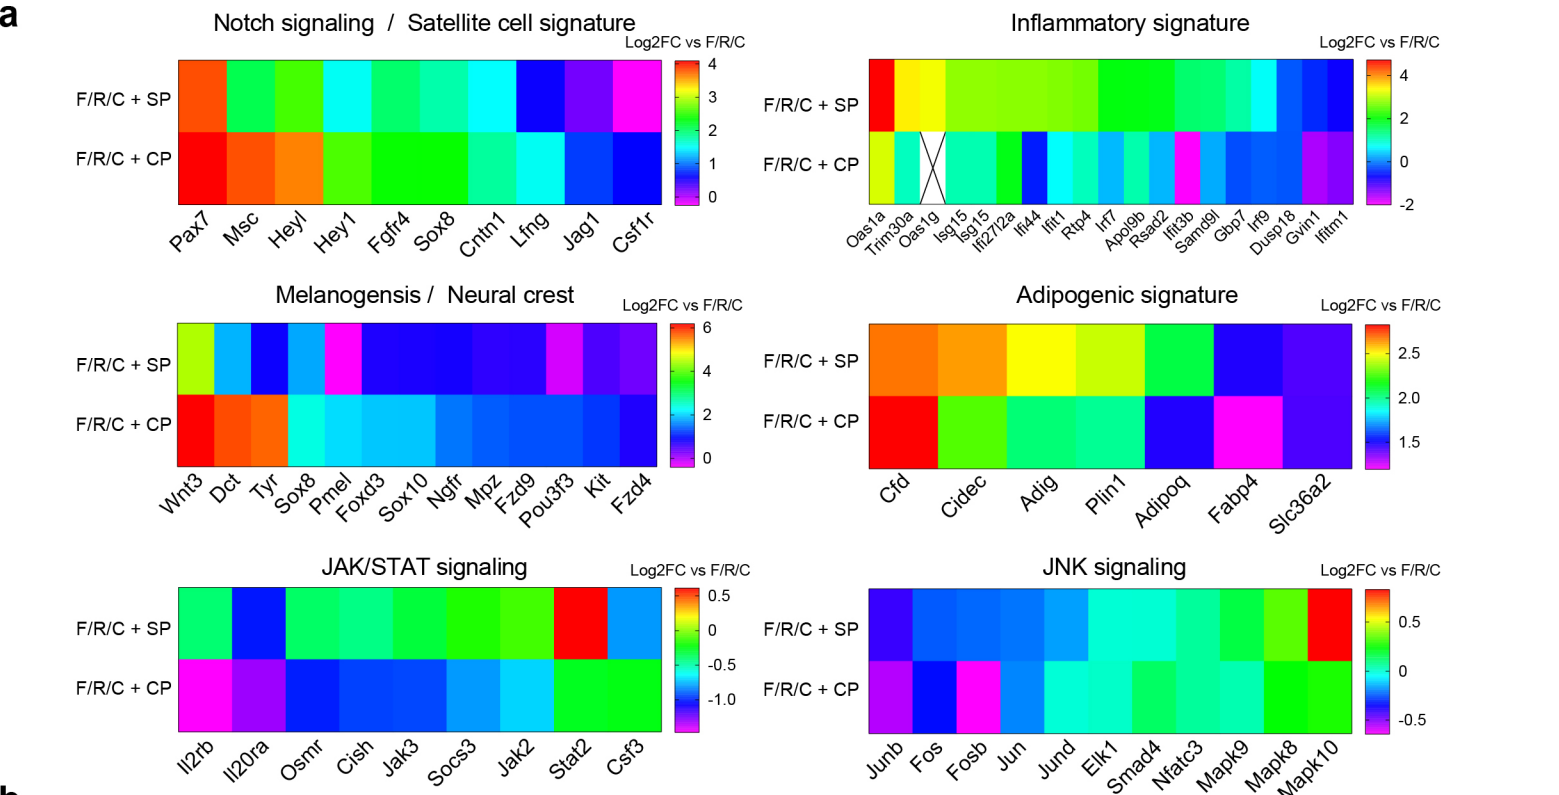

b

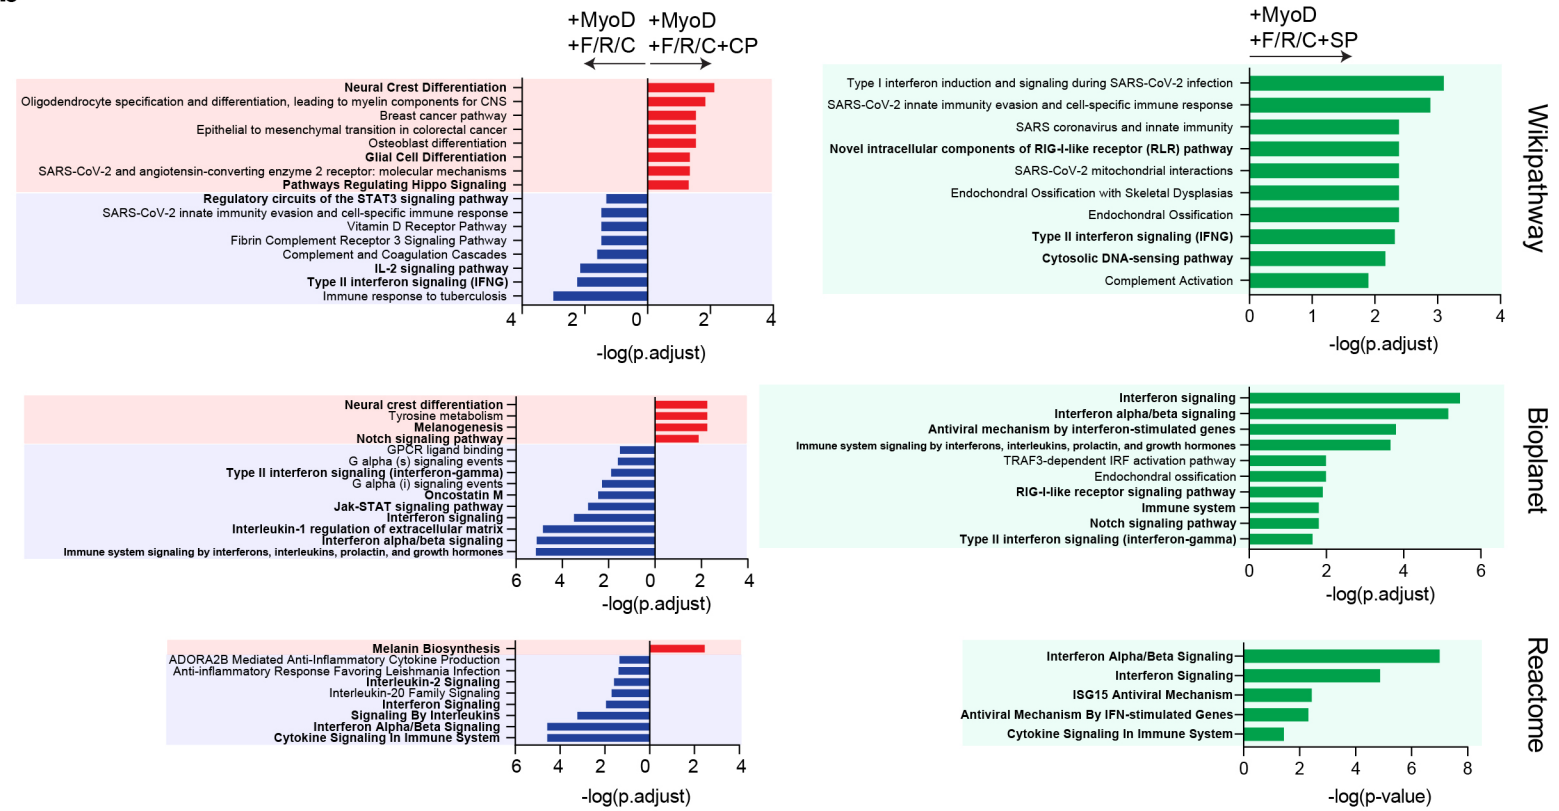

### Supplementary Figure 10: Functional annotation analysis based on bulk RNA-seq

**(a)** Heatmaps showing relative gene expression levels related to relevant biological processes in comparison between F/R/C and the indicated conditions at day 10 of reprogramming. **(b)** ORA using the indicated databases and conditions at day 10 of reprogramming. Only significant pathways are shown ( $p_{\text{adjust}} < 0.05$ ). Terms of interest are highlighted in bold.

# Supplementary Figure 11

**a**

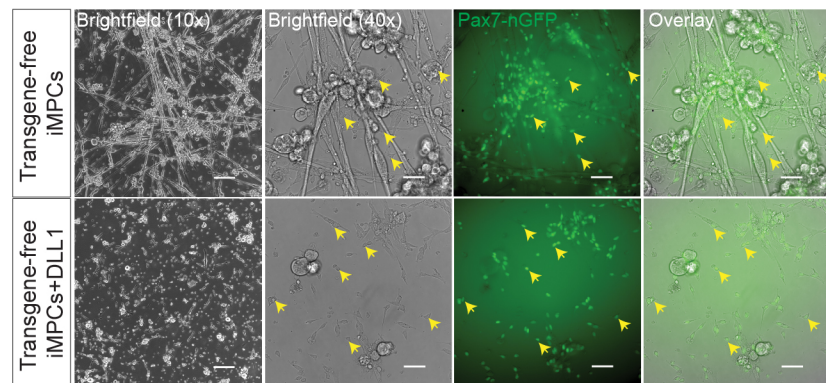

▲ = Pax7-nGFP+ nucleus

**b**

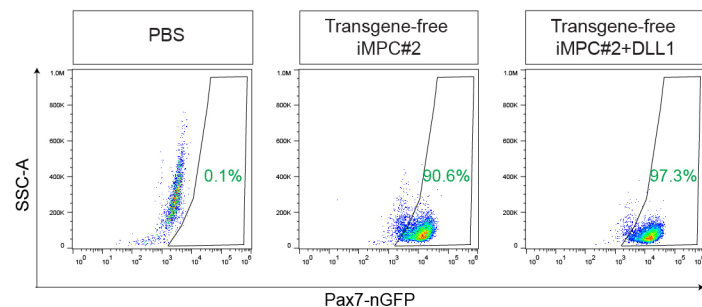

**c**

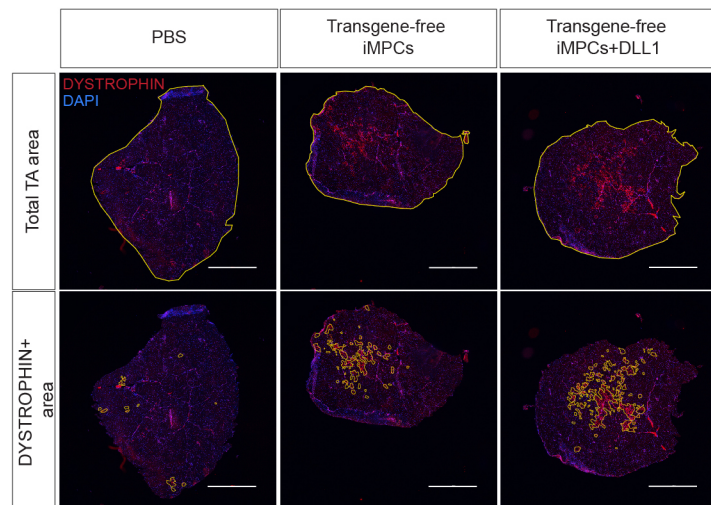

**d**

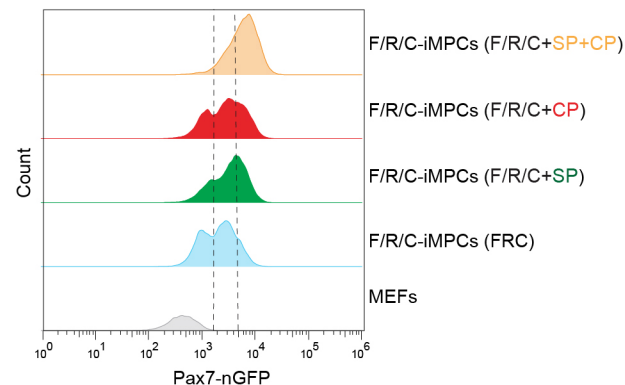



### Supplementary Figure 11: Intramuscular transplantation of transgene-free iPSCs

**(a)** Brightfield and fluorescence images of transgene-free *Pax7-nGFP* iPSCs cultured with and without DLL1 for 5 days. Arrowheads indicate *Pax7-nGFP*<sup>+</sup> cells. Scale bar, 200µm (10x) or 50µm (40x). **(b)** Flow cytometric analysis of transgene-free iPSCs cultured on plastic or DLL1-coated plates and analyzed after 5 consecutive days of culture. **(c)** Representative immunofluorescence images of DYSTROPHIN in TA muscles around 4 weeks post cell transplantation. Shown is the quantification method of total DYSTROPHIN<sup>+</sup> TA muscle area as calculated by the software ImageJ. Scale bar, 1mm. **(d)** FACS histograms showing GFP fluorescence intensity in the indicated conditions at day 10 of reprogramming. Related to Figure 4G.

### Supplementary Video 1

This movie shows a contractile transgene-free iMPC clone produced by MyoD+F/R/C at passage 3.

## Supplementary Tables

### Supplementary Table 1 - RT-qPCR probe sequences

The following probes were used in this study:

| Gene         | Primer sequence                                                                                                        |
|--------------|------------------------------------------------------------------------------------------------------------------------|
| <i>Gapdh</i> | Forward: GTGGAGTCATACTGGAACATGTAG<br>Reverse: AATGGTGAAGGTCGGTGTG<br>Probe: 56-FAM/TGCAAATGG/ZEN/CAGCCCTGGTG/3IABkFQ/  |
| <i>Pax7</i>  | Forward: GAAGAAGTCCCAGCACAGC<br>Reverse: GCTACCAGTACAGCCAGTATG<br>Probe: 56-FAM/CCAAAAACG/ZEN/TGAGCCTGTCCACAC/3IABkFQ/ |
| <i>Myod1</i> | Forward: GACACAGCCGCACTCTT<br>Reverse: GCTCTGATGGCATGATGGAT<br>Probe: 56-FAM/ACGACACCG/ZEN/CCTACTACAGTGAGG/3IABkFQ/    |
| <i>Myh1</i>  | Forward: GTGAGCTCTGCGTTGATCT<br>Reverse: GCAGCTCCAAGTTCAGTCT<br>Probe: 56-FAM/AGGCCAAAA/ZEN/TCAAAGAGGTGACCGA/3IABkFQ/  |
| <i>Myog</i>  | Forward: GACCGAACTCCAGTGCATT<br>Reverse: CTTGCTCAGCTCCCTCAAC<br>Probe: 56-FAM/AGCCCATGG/ZEN/TGCCCAGTGAAT/3IABkFQ/      |
| <i>Myf6</i>  | Forward: CCACGTTTGCTCCTCCTTC<br>Reverse: CCCTACAGCTACAAACCCAAG<br>Probe: 56-FAM/AGGCCCTG/ZEN/GAATGATCCGAAAC/3IABkFQ/   |
| <i>Myh4</i>  | Forward: TGCTGGATCTTACGGAATTG<br>Reverse: GGACTTGGTGGACAACTACA<br>Probe: 56-FAM/CTGAGGAGG/ZEN/CTGAGGAACAATCCA/3IABkFQ/ |

### Supplementary Table 2 - Media composition

| Medium      | Composition                                                                                                                                                                                                                                                                                                                                                                                                                                                                              |
|-------------|------------------------------------------------------------------------------------------------------------------------------------------------------------------------------------------------------------------------------------------------------------------------------------------------------------------------------------------------------------------------------------------------------------------------------------------------------------------------------------------|
| MEF medium  | <ul style="list-style-type: none"> <li>• DMEM (Thermo Fisher, Cat. #10313021)</li> <li>• 1% MEM NEAA, (Thermo Fisher, Cat. #11140050)</li> <li>• 1% Pen/Strep (Thermo Fisher, Cat #15140122)</li> <li>• 0.1% 2-Mercaptoethanol (Thermo Fisher, Cat. #21985023)</li> <li>• 10% (50ml) FBS (Thermo Fisher, Cat. #10270-106)</li> </ul>                                                                                                                                                     |
| iMPC medium | <ul style="list-style-type: none"> <li>• KnockOut-DMEM (Thermo Fisher, Cat. #10829018)</li> <li>• 1% GlutaMAX, (Thermo Fisher, Cat. #35050061)</li> <li>• 1% NEAA (Thermo Fisher, Cat. #11140050)</li> <li>• 1% Pen/Strep, 10'000 U/ml (Thermo Fisher, Cat. #15140122)</li> <li>• 0.1% 2-Mercaptoethanol (Thermo Fisher, Cat. #21985023)</li> <li>• 10% FBS (50ml) (Thermo Fisher, Cat. #10270-106)</li> <li>• 10% KnockOut Serum Replacement (Thermo Fisher, Cat. #10828028)</li> </ul> |



| Medium                 | Composition                                                                                                                                                                                               |
|------------------------|-----------------------------------------------------------------------------------------------------------------------------------------------------------------------------------------------------------|
|                        | <ul style="list-style-type: none"> <li>• 10ng/ml basic FGF (R&amp;D, Cat. #233-FB)</li> </ul>                                                                                                             |
| Differentiation medium | <ul style="list-style-type: none"> <li>• DMEM (Thermo Fisher, Cat. #41966029)</li> <li>• 1% Pen/Strep (Thermo Fisher, Cat #15140122)</li> <li>• 2% Horse serum (Thermo Fisher, Cat. #16050122)</li> </ul> |

**Supplementary Table 3 - Small molecules used in this study**

| Small molecule               | Abbreviation | Biological function            | Concentration | Source / cat#                          |
|------------------------------|--------------|--------------------------------|---------------|----------------------------------------|
| Forskolin                    | F            | Adenylyl cyclase activator     | 5μM           | R&D systems / #1099                    |
| RepSox                       | R            | TGF-βRI inhibitor              | 5μM           | R&D systems / #3742                    |
| CHIR 99021                   | C            | GSK3β inhibitor/Wnt activator  | 3μM           | R&D systems / #4423                    |
| SP600125                     | SP           | JNK inhibitor                  | 10μM          | Tocris /#1496                          |
| CP690550 citrate             | CP           | JAK inhibitor                  | 200nM         | Tocris /#4556                          |
| PP1                          | -            | Src family kinase inhibitor    | 10μM          | Tocris /#1397                          |
| A 83-01                      | -            | TGF-βRI inhibitor              | 10μM          | Tocris /#2939; Sigma-Aldrich /#SML0788 |
| (S)-(+)-Dimethindene maleate | Dimethindene | M2 antagonist                  | 2μM           | Tocris /#1425                          |
| Rapamycin                    | -            | mTOR inhibitor                 | 10nM          | Tocris/#1292                           |
| Lithium Chloride             | LiCl         | GSK3β inhibitor/Wnt activator  | 1mM           | Konrad Hochedlinger lab                |
| Y-27632 dihydrochloride      | Y-27         | ROCK inhibitor                 | 10μM          | Tocris/#1254                           |
| EPZ 004777                   |              | DOT1L inhibitor                | 5μM           | Tocris/#5567                           |
| SB 203580                    | -            | p38 inhibitor                  | 10μM          | Tocris#1202                            |
| Retinoic acid                | -            | Retinoic acid receptor agonist | 2μM           | Tocris/#0695                           |
| INK128                       | -            | mTORC1/2 inhibitor             | 200nM         | Medchem Express# HY-13328              |
| PD 0325901                   | -            | MEK1/2 inhibitor               | 1μM           | Tocris/#4192                           |

| Small molecule                     | Abbreviation | Biological function                                | Concentration | Source / cat#            |
|------------------------------------|--------------|----------------------------------------------------|---------------|--------------------------|
| LDN 193189 dihydrochloride         | LDN          | BMP4 signaling inhibitor                           | 100nM         | Tocris/#6053             |
| Dorsomorphin dihydrochloride       | Dorsomorphin | AMPK inhibitor / BMP type 1 receptor inhibitor     | 0.5µM         | Tocris/#3093             |
| Pluripotin                         | -            | ERK1/RasGAP inhibitor                              | 1µM           | Tocris/#4433             |
| Bone morphogenic protein 4 (human) | BMP4         | Growth factor                                      | 10ng/ml       | Sigma-Aldrich / #SRP3016 |
| Insulin-like growth factor 1       | IGF1         | Growth factor                                      | 100ng/ml      | Sigma-Aldrich / #I8779   |
| Epidermal growth factor (human)    | EGF          | Growth factor                                      | 10ng/ml       | R&D systems / #236-EG    |
| Resveratrol                        | -            | Cyclooxygenase inhibitor / SIRT1 activator         | 10nM          | Tocris /#1418            |
| Valproic acid                      | VPA          | HDAC inhibitor                                     | 0.5µM         | Lucerna-Chem / #HY-10585 |
| 5-Azacytidine                      | 5-aza        | DNMT1 inhibitor                                    | 5µM           | Sigma-Aldrich / #A2385   |
| Tranylcypromine                    | -            | Monoamine oxidase inhibitor, demethylase inhibitor | 2µM           | Konrad Hochedlinger lab  |
| Trichostatin A                     | -            | HDAC inhibitor                                     | 20nM          | Sigma-Aldrich /#T1952    |
| Sodium butyrate                    | -            | HDAC inhibitor                                     | 100µM         | Tocris/#3850             |

**Supplementary Table 4 – Antibodies used in this study**

| Antibody                | application (concentration)   | source/cat#                     |
|-------------------------|-------------------------------|---------------------------------|
| Anti-Pax7 (mouse IgG1)  | IF (1:100-1:200); WB (1:1000) | R&D systems/Cat. #MAB1675       |
| Anti-MyoD (mouse IgG1)  | IF (1:200)                    | Invitrogen/Cat. #MA5-12902      |
| Anti-Myog (mouse IgG1)  | IF (1:500)                    | SCBT/Cat. #SC-12732 (clone F5D) |
| Anti-MyHC (mouse IgG2b) | IF (1:1000); WB (1:1000)      | R&D systems/Cat. #MAB4470       |

| <b>Antibody</b>                  | <b>application<br/>(concentration)</b> | <b>source/cat#</b>              |
|----------------------------------|----------------------------------------|---------------------------------|
| Anti-Dystrophin (rabbit IgG)     | IF (1:200)                             | Abcam/Cat. #Ab15277             |
| Anti-GFP (mouse IgG2a)           | IF (1:50)                              | Thermo Fisher/Cat. #A1120       |
| Anti-Ki-67 (rabbit IgG)          | IF (1:250)                             | Thermo Fisher/Cat.<br>#MA514520 |
| Goat anti-rabbit IgG AF 488      | IF (1:400)                             | Thermo Fisher/Cat. #11008       |
| Goat anti-mouse IgG2b AF 546     | IF (1:500)                             | Thermo Fisher/Cat.<br>#A21143   |
| Goat anti-mouse IgG1 AF 546      | IF (1:400)                             | Thermo Fisher/Cat.<br>#A21123   |
| Goat anti-mouse IgG1 AF 647      | IF (1:500)                             | Thermo Fisher/Cat.<br>#A21240   |
| Donkey anti-rabbit IgG AF 546    | IF (1:400)                             | Thermo Fisher/Cat. #10040       |
| Donkey anti-rabbit IgG AF 647    | IF (1:400)                             | Thermo Fisher/Cat.<br>#A31573   |
| Horse anti-mouse IgG, HRP-linked | WB (1:1000)                            | Cell Signaling/Cat.<br>#7076S   |

**Supplementary Table 5 - Plasmids**

| <b>Purpose</b>                                 | <b>Plasmid name</b>                              | <b>Source</b>           | <b>Addgene<br/>retrieval<br/>code</b> |
|------------------------------------------------|--------------------------------------------------|-------------------------|---------------------------------------|
| Lentivirus packaging vector                    | pLV delta 8.9                                    | Konrad Hochedlinger Lab | -                                     |
| Lentivirus envelope vector                     | pLV VSVG                                         | Konrad Hochedlinger Lab | -                                     |
| Lentivirus transfer vector                     | pLV[Exp]-Neo-EF1A>Tet3G                          | VectorBuilder           | #184379                               |
| Lentivirus transfer vector                     | pLV[Tet]-Puro-TRE3G>mMyod1[NM_010866. 2]         | VectorBuilder           | #184380                               |
| DNA template for <i>in vitro</i> transcription | pT7[mRNA]-5'UTR:mMyod1[NM_010866.2]:Hba-a1_3'UTR | VectorBuilder           | #205026                               |
